# Supplementary material for: Briaviolides K–N, New Briarane-Type Diterpenoids from Cultured Octocoral Briareum violaceum
Source: PubMed Central journal article supplement (PMC5867619; doi:10.3390/md16030075), 2018-02-27
Supplement: marinedrugs-16-00075-s001.pdf [file marinedrugs-16-00075-s001.pdf]

## Supporting Information

# Briaviolides K–N, New Briarane-type Diterpenoids from Cultured Octocoral *Briareum violaceum*

Jing-Hao Xu <sup>1,2</sup>, Kuei-Hung Lai <sup>2,3</sup>, Yin-Di Su <sup>2,4</sup>, Yu-Chia Chang <sup>2,4,5</sup>, Bo-Rong Peng <sup>2,6,7</sup>, Anders Backlund <sup>3</sup>, Zhi-Hong Wen <sup>5,\*</sup>, and Ping-Jyun Sung <sup>1,2,5,8,9,\*</sup>

<sup>1</sup> Graduate Institute of Marine Biology, National Dong Hwa University, Pingtung 94450, Taiwan

<sup>2</sup> Planning & Research Division, National Museum of Marine Biology and Aquarium, Pingtung 94450, Taiwan

<sup>3</sup> Division of Pharmacognosy, Department of Medicinal Chemistry, Uppsala University, Uppsala 75123, Sweden

<sup>4</sup> Greenhouse Systems Technology Center, Central Region Campus, Industrial Technology Research Institute, Nantou 54041, Taiwan

<sup>5</sup> Department of Marine Biotechnology and Resources, National Sun Yat-sen University, Kaohsiung 80424, Taiwan;

<sup>6</sup> Doctoral Degree Program in Marine Biotechnology, National Sun Yat-sen University, Kaohsiung 80424, Taiwan; pengpojung@gmail.com

<sup>7</sup> Doctoral Degree Program in Marine Biotechnology, Academia Sinica, Taipei 11529, Taiwan

<sup>8</sup> Graduate Institute of Natural Products, Kaohsiung Medical University, Kaohsiung 80708, Taiwan

<sup>9</sup> Chinese Medicine Research and Development Center, China Medical University Hospital, Taichung 40447, Taiwan

| No   | Content                                                                                   | page |
|------|-------------------------------------------------------------------------------------------|------|
| S1.  | HR-ESI-MS spectrum of compound <b>1</b> .                                                 | 3    |
| S2.  | IR spectrum of compound <b>1</b> .                                                        | 3    |
| S3.  | <sup>1</sup> H NMR spectrum (400 MHz) of compound <b>1</b> in CDCl <sub>3</sub> .         | 4    |
| S4.  | <sup>13</sup> C NMR spectrum (100 MHz) of compound <b>1</b> in CDCl <sub>3</sub> .        | 4    |
| S5.  | DEPT spectrum of compound <b>1</b> in CDCl <sub>3</sub> .                                 | 5    |
| S6.  | gHSQC spectrum of compound <b>1</b> in CDCl <sub>3</sub> .                                | 5    |
| S7.  | <sup>1</sup> H– <sup>1</sup> H gCOSY spectrum of compound <b>1</b> in CDCl <sub>3</sub> . | 6    |
| S8.  | gHMBC spectrum of compound <b>1</b> in CDCl <sub>3</sub> .                                | 6    |
| S9.  | NOESY spectrum of compound <b>1</b> in CDCl <sub>3</sub> .                                | 7    |
| S10. | HR-ESI-MS spectrum of compound <b>2</b> .                                                 | 7    |
| S11. | IR spectrum of compound <b>2</b> .                                                        | 8    |
| S12. | <sup>1</sup> H NMR spectrum (400 MHz) of compound <b>2</b> in CDCl <sub>3</sub> .         | 8    |
| S13. | <sup>13</sup> C NMR spectrum (100 MHz) of compound <b>2</b> in CDCl <sub>3</sub> .        | 9    |
| S14. | DEPT spectrum of compound <b>2</b> in CDCl <sub>3</sub> .                                 | 9    |
| S15. | gHSQC spectrum of compound <b>2</b> in CDCl <sub>3</sub> .                                | 10   |
| S16. | <sup>1</sup> H– <sup>1</sup> H gCOSY spectrum of compound <b>2</b> in CDCl <sub>3</sub> . | 10   |
| S17. | gHMBC spectrum of compound <b>2</b> in CDCl <sub>3</sub> .                                | 11   |
| S18. | NOESY spectrum of compound <b>2</b> in CDCl <sub>3</sub> .                                | 11   |
| S19. | HR-ESI-MS spectrum of compound <b>3</b> .                                                 | 12   |
| S20. | IR spectrum of compound <b>3</b> .                                                        | 12   |
| S21. | <sup>1</sup> H NMR spectrum (500 MHz) of compound <b>3</b> in CDCl <sub>3</sub> .         | 13   |
| S22. | <sup>13</sup> C NMR spectrum (125 MHz) of compound <b>3</b> in CDCl <sub>3</sub> .        | 13   |
| S23. | DEPT spectrum of compound <b>3</b> in CDCl <sub>3</sub> .                                 | 14   |
| S24. | gHSQC spectrum of compound <b>3</b> in CDCl <sub>3</sub> .                                | 14   |

---

|      |                                                                                      |    |
|------|--------------------------------------------------------------------------------------|----|
| S25. | $^1\text{H}$ - $^1\text{H}$ gCOSY spectrum of compound <b>3</b> in $\text{CDCl}_3$ . | 15 |
| S26. | gHMBC spectrum of compound <b>3</b> in $\text{CDCl}_3$ .                             | 15 |
| S27. | NOESY spectrum of compound <b>3</b> in $\text{CDCl}_3$ .                             | 16 |
| S28. | HR-ESI-MS spectrum of compound <b>4</b> .                                            | 16 |
| S29. | IR spectrum of compound <b>4</b> .                                                   | 17 |
| S30. | $^1\text{H}$ NMR spectrum (400 MHz) of compound <b>4</b> in $\text{CDCl}_3$ .        | 17 |
| S31. | $^{13}\text{C}$ NMR spectrum (100 MHz) of compound <b>4</b> in $\text{CDCl}_3$ .     | 18 |
| S32. | DEPT spectrum of compound <b>4</b> in $\text{CDCl}_3$ .                              | 18 |
| S33. | gHSQC spectrum of compound <b>4</b> in $\text{CDCl}_3$ .                             | 19 |
| S34. | $^1\text{H}$ - $^1\text{H}$ gCOSY spectrum of compound <b>4</b> in $\text{CDCl}_3$ . | 19 |
| S35. | gHMBC spectrum of compound <b>4</b> in $\text{CDCl}_3$ .                             | 20 |
| S36. | NOESY spectrum of compound <b>4</b> in $\text{CDCl}_3$ .                             | 20 |

---

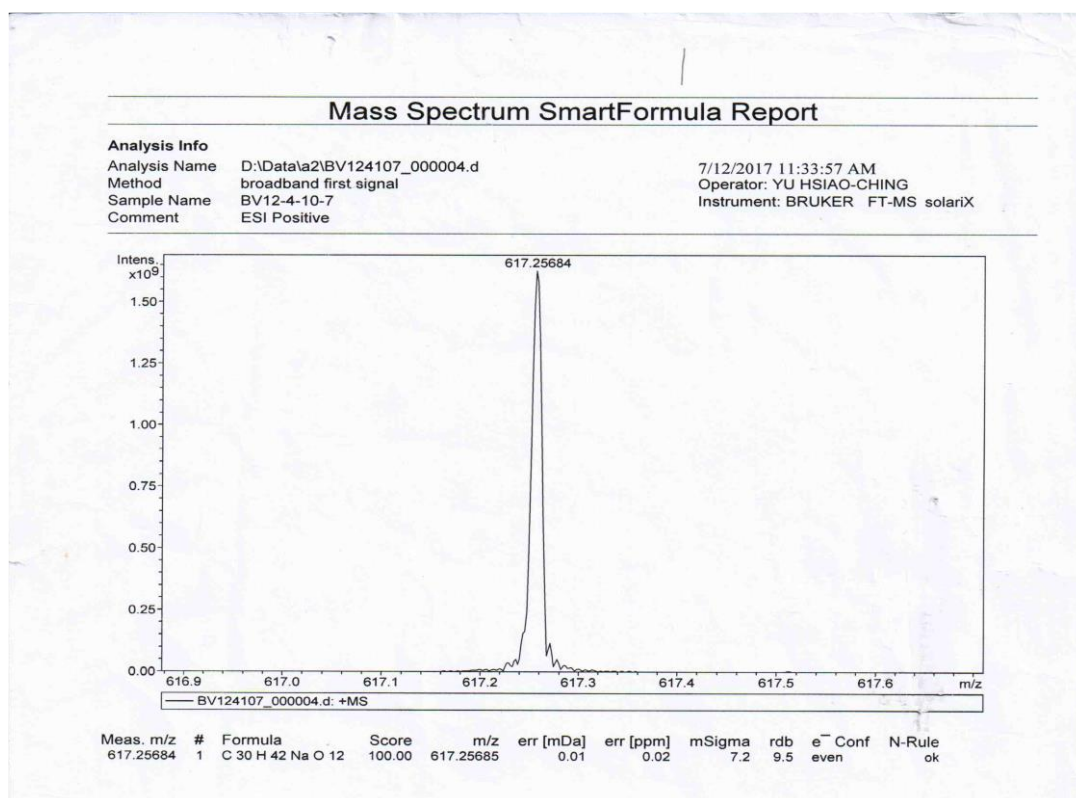

S1. HR-ESI-MS spectrum of compound **1**.

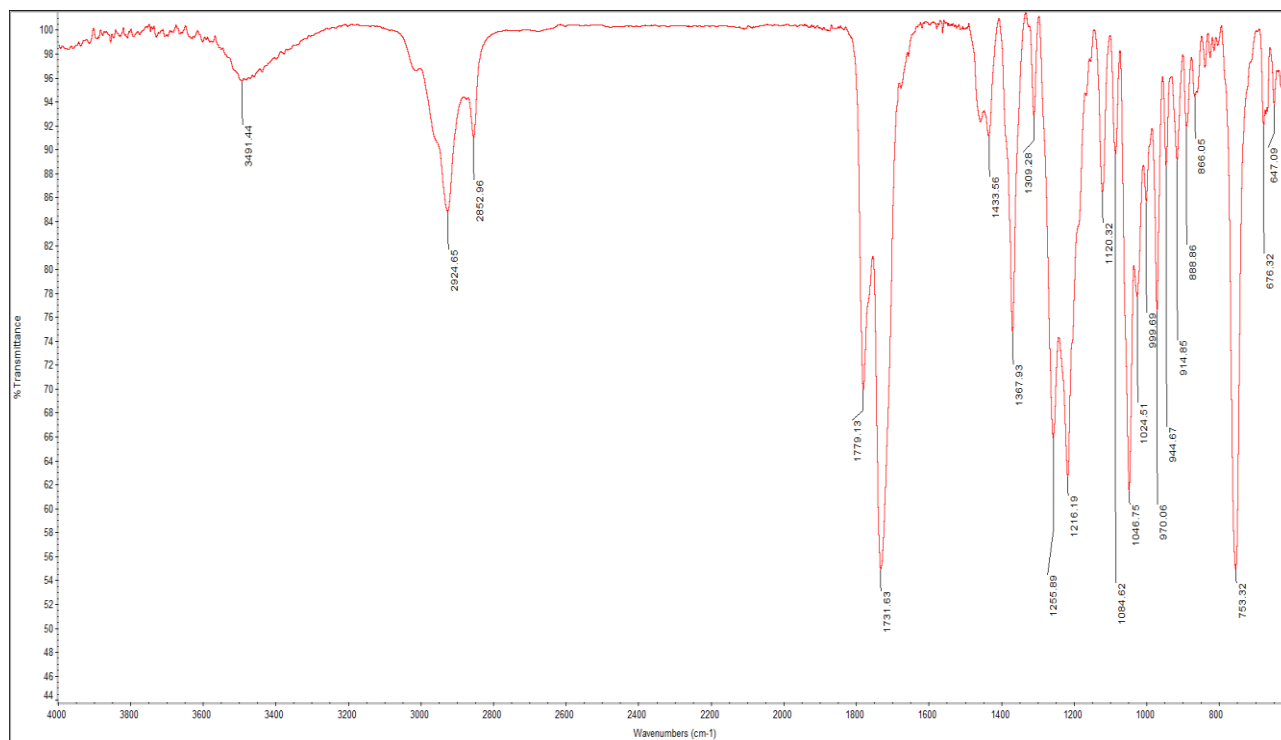

S2. IR spectrum of compound **1**.

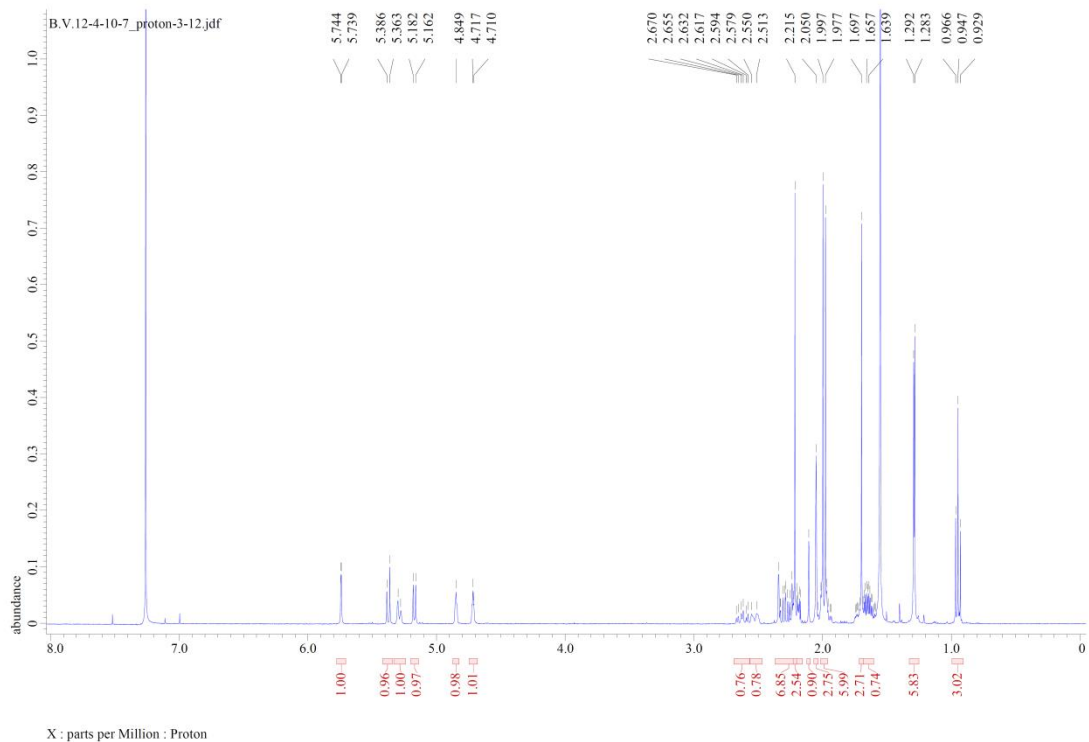

S3.  $^1\text{H}$  NMR spectrum (400 MHz) of compound **1** in  $\text{CDCl}_3$

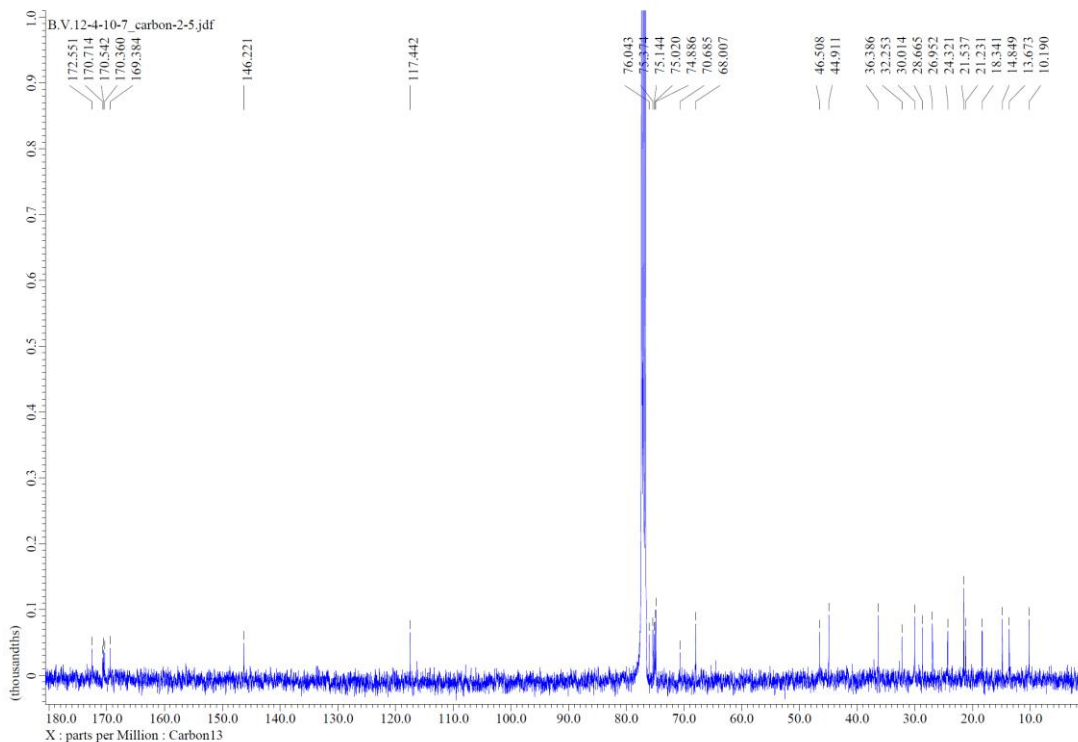

S4.  $^{13}\text{C}$  NMR spectrum (100 MHz) of compound **1** in  $\text{CDCl}_3$ .

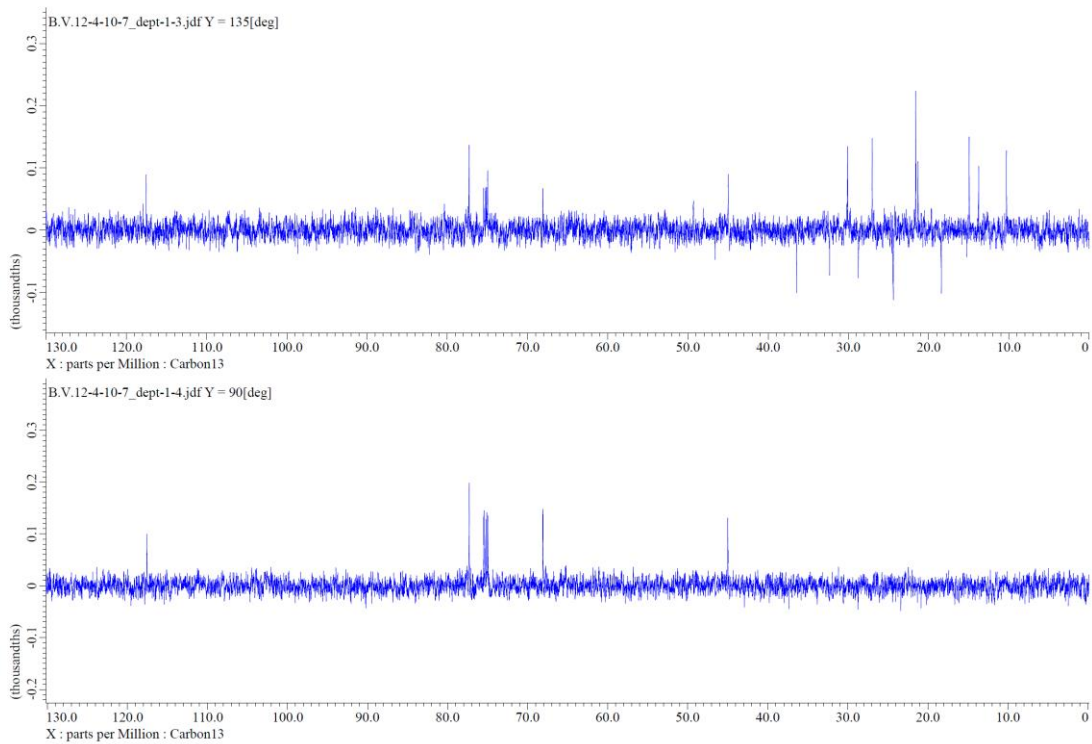

S5. DEPT spectrum of compound **1** in CDCl<sub>3</sub>.

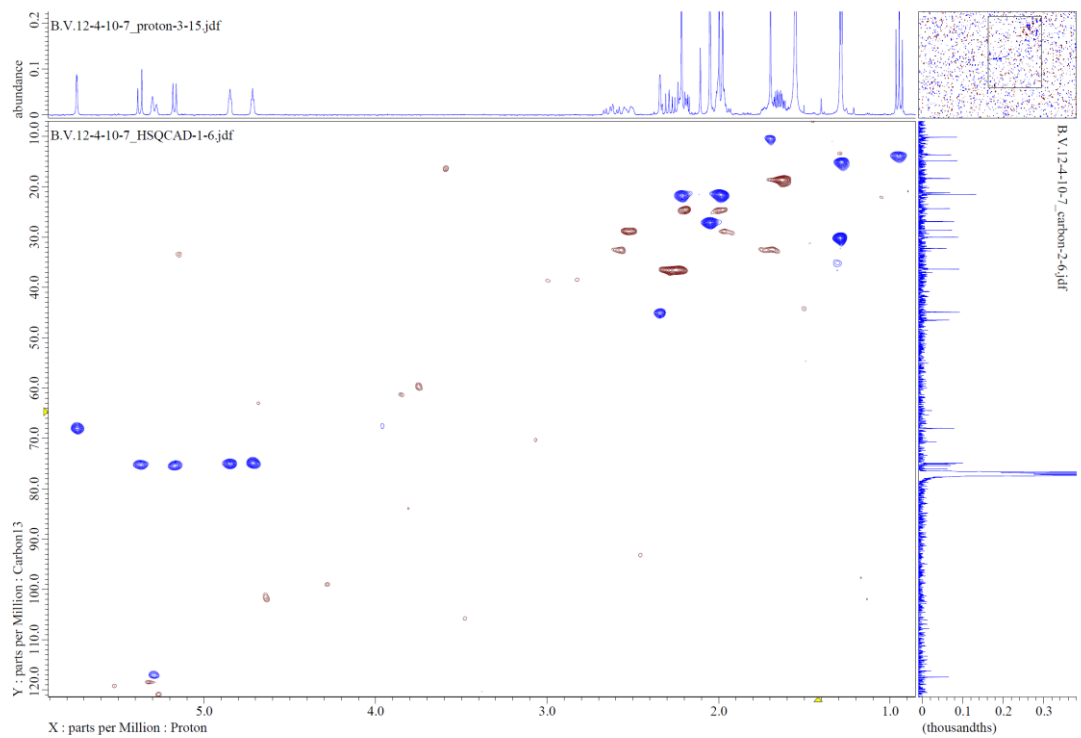

S6. gHSQC spectrum of compound **1** in CDCl<sub>3</sub>.

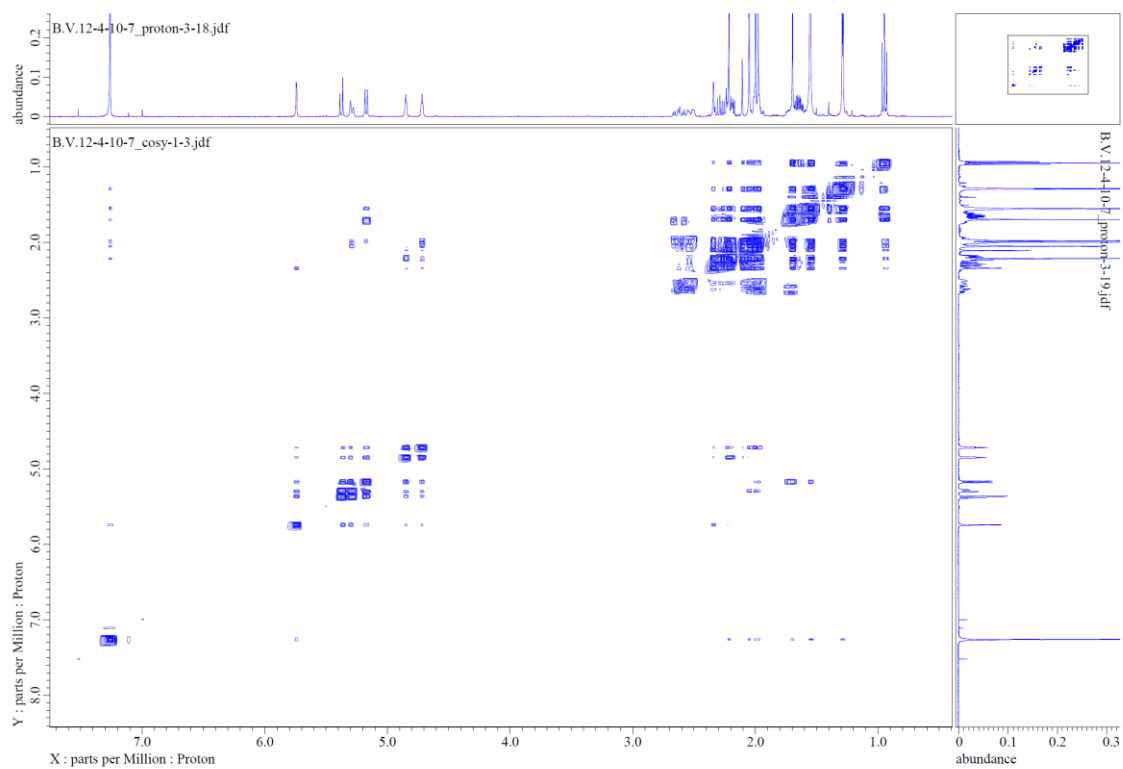

S7.  $^1\text{H}$ - $^1\text{H}$  gCOSY spectrum of compound **1** in  $\text{CDCl}_3$ .

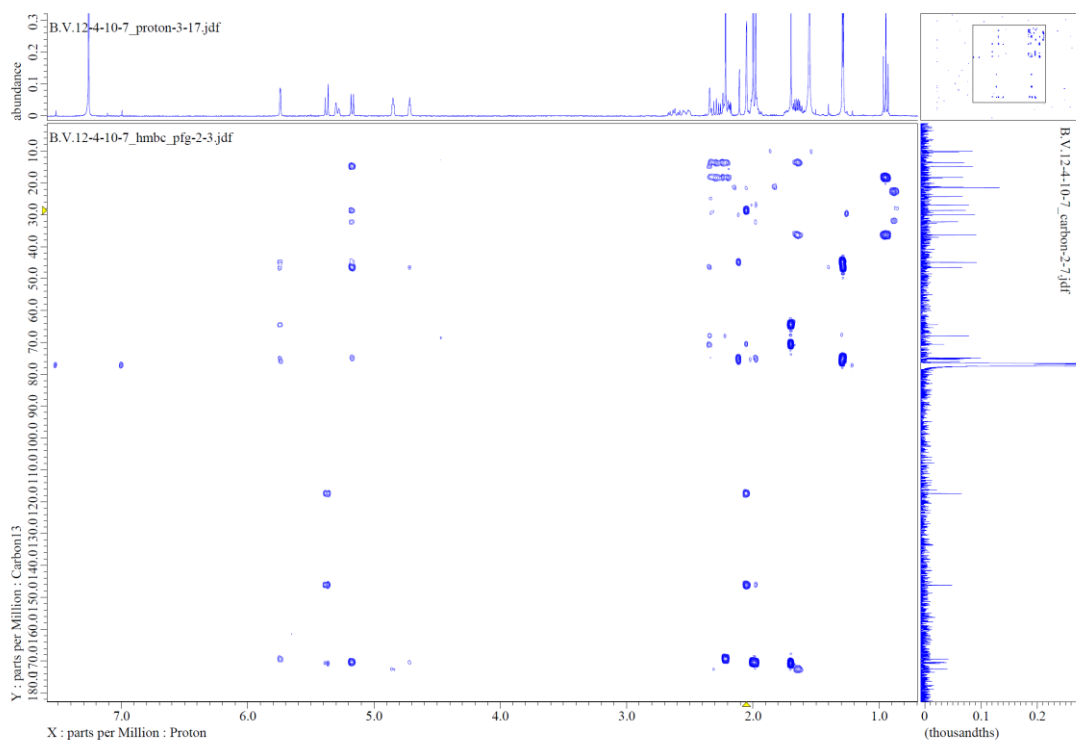

S8. gHMBC spectrum of compound **1** in  $\text{CDCl}_3$ .

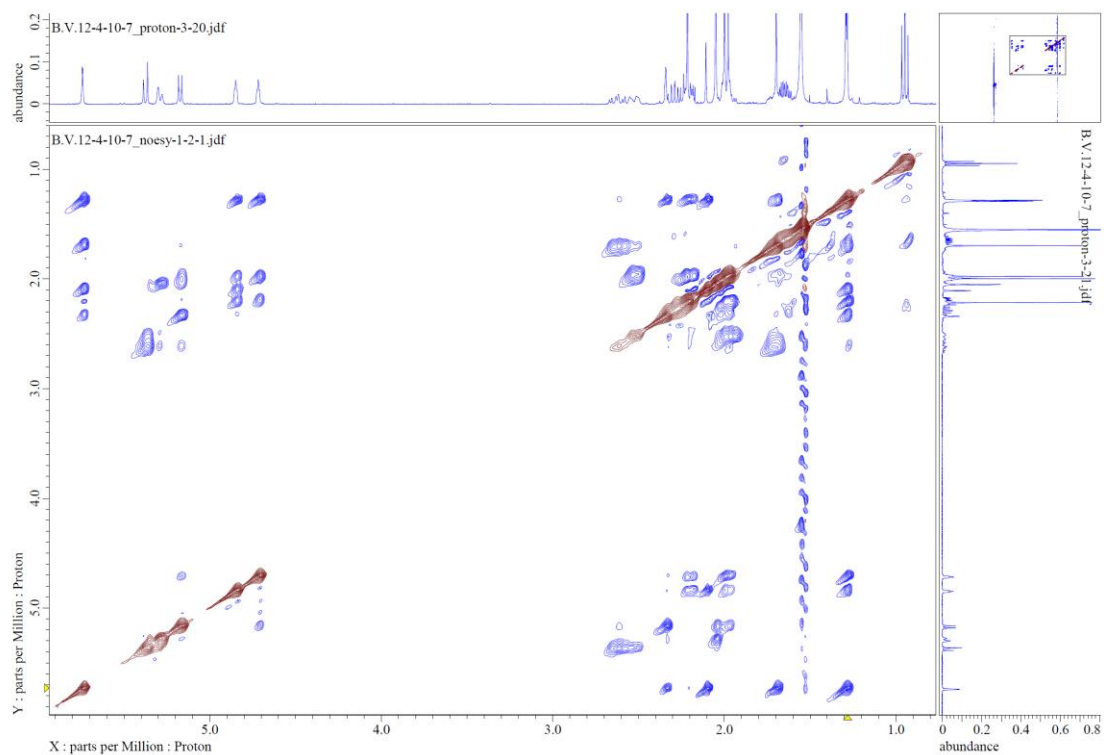

S9. NOESY spectrum of compound **1** in CDCl<sub>3</sub>.

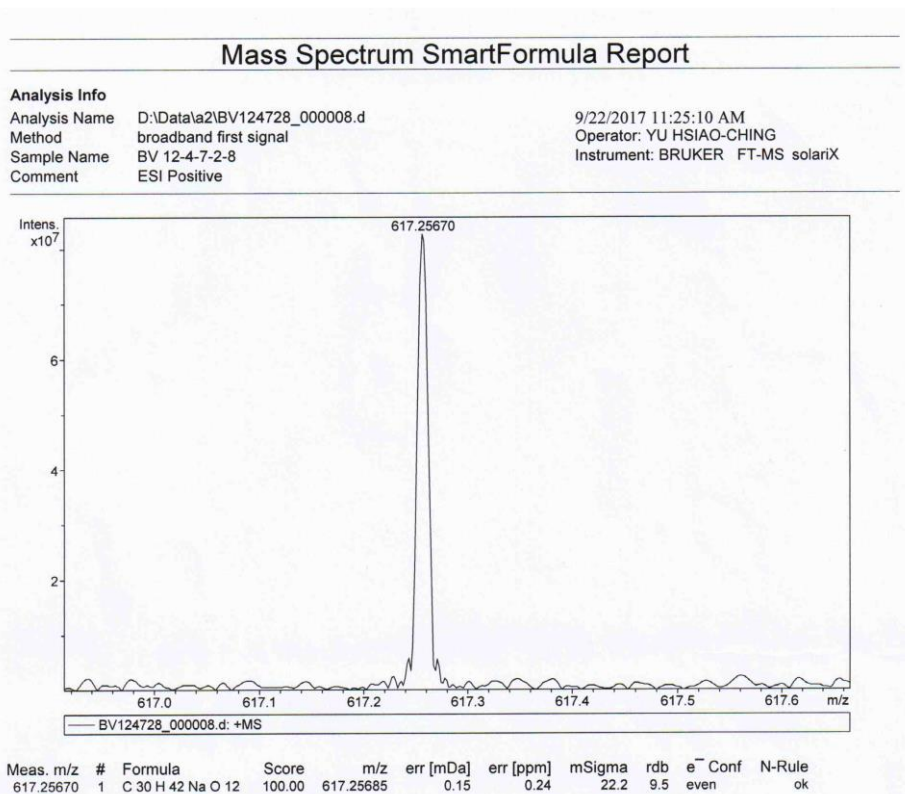

S10. HR-ESI-MS spectrum of compound **2**.

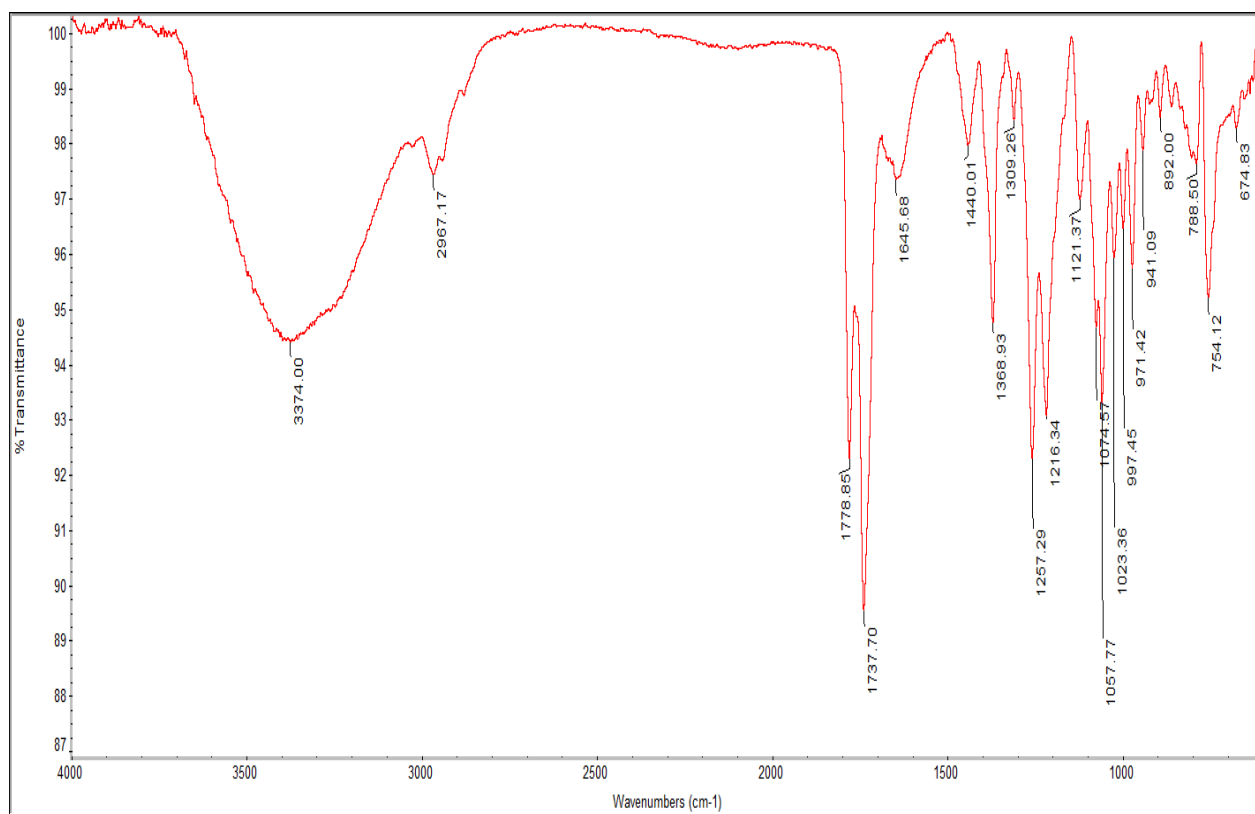

S11. IR spectrum of compound **2**.

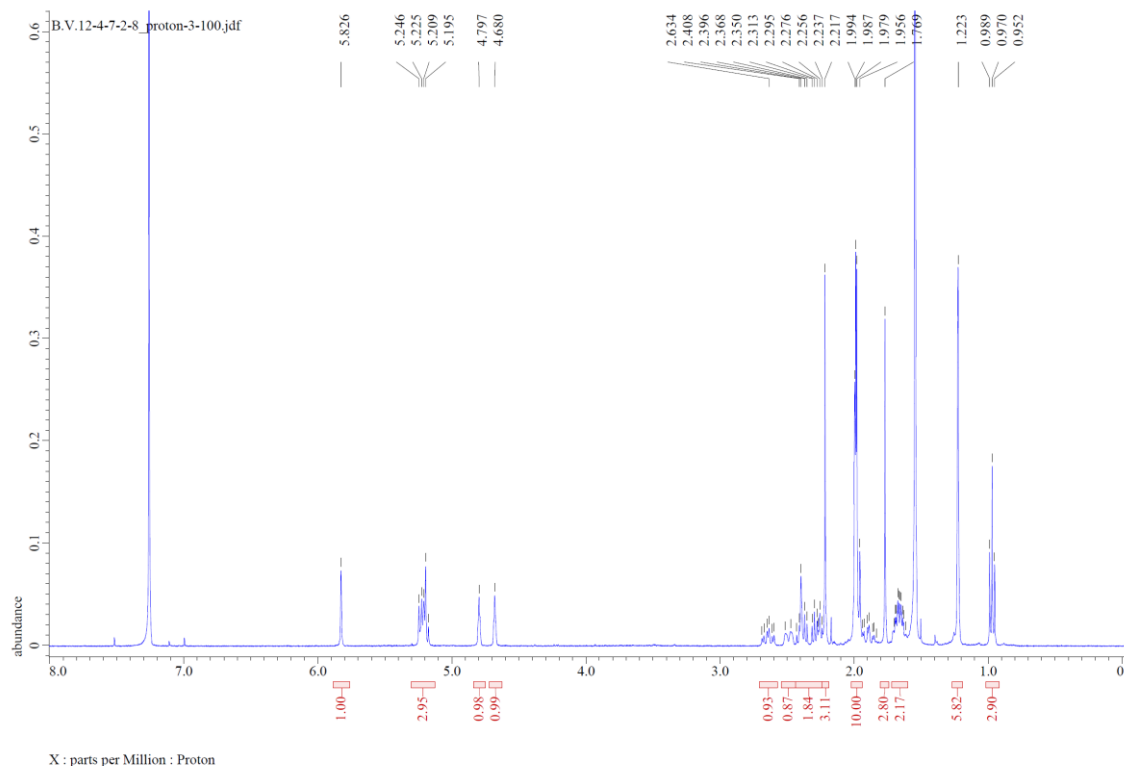

S12. <sup>1</sup>H NMR spectrum (400 MHz) of compound **2** in CDCl<sub>3</sub>.



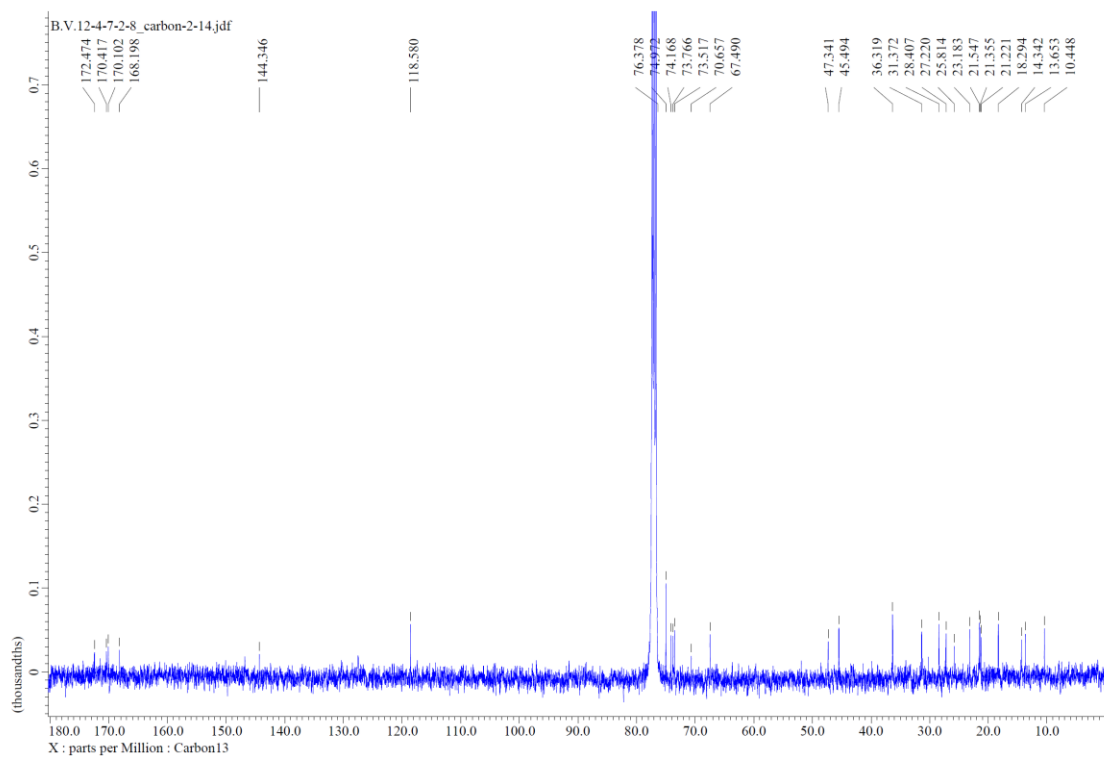

S13.  $^{13}\text{C}$  NMR spectrum (100 MHz) of compound **2** in  $\text{CDCl}_3$ .

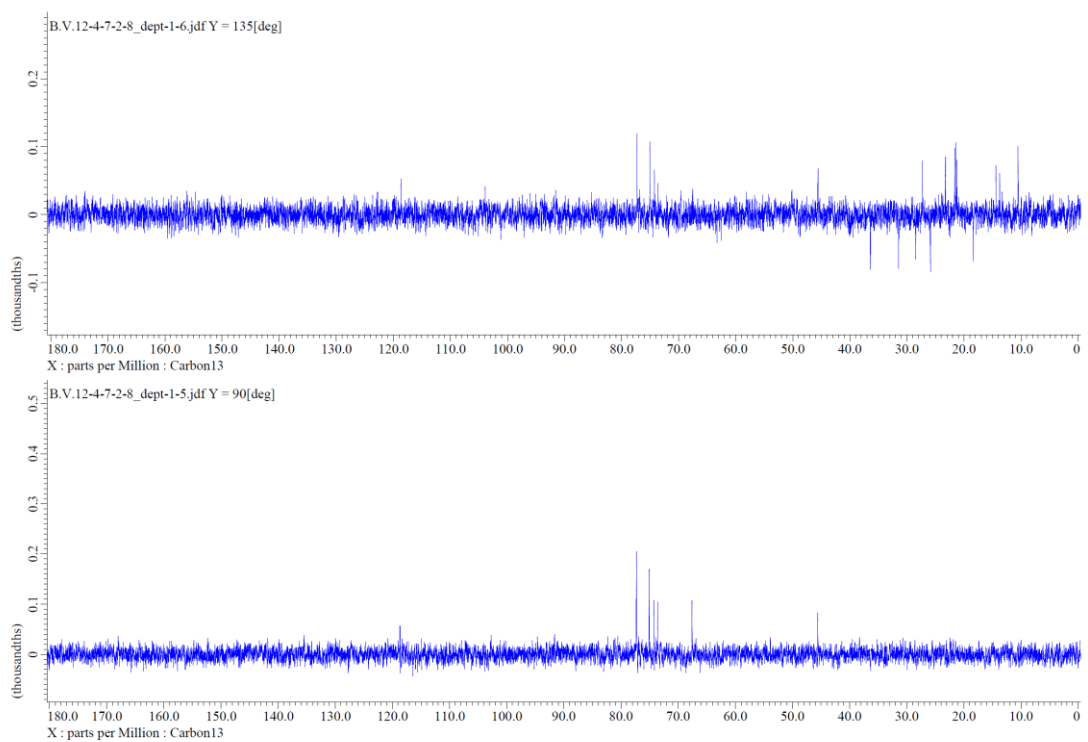

S14. DEPT spectrum of compound **2** in  $\text{CDCl}_3$ .

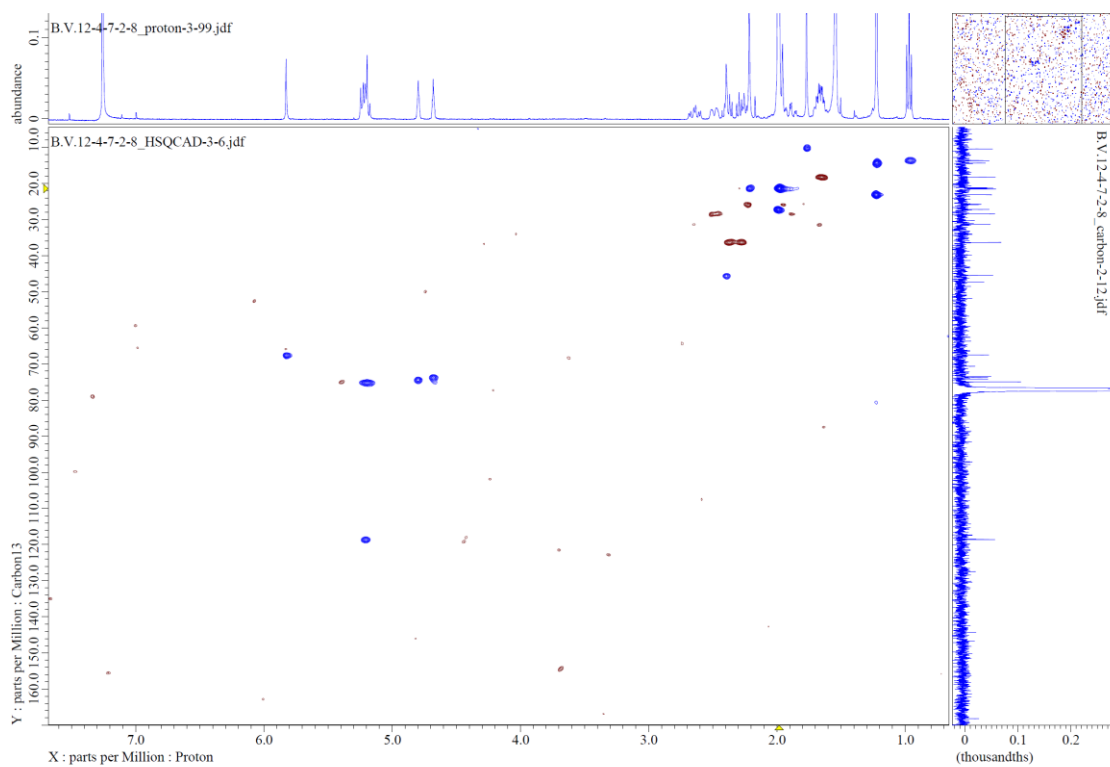

S15. gHSQC spectrum of compound **2** in CDCl<sub>3</sub>.

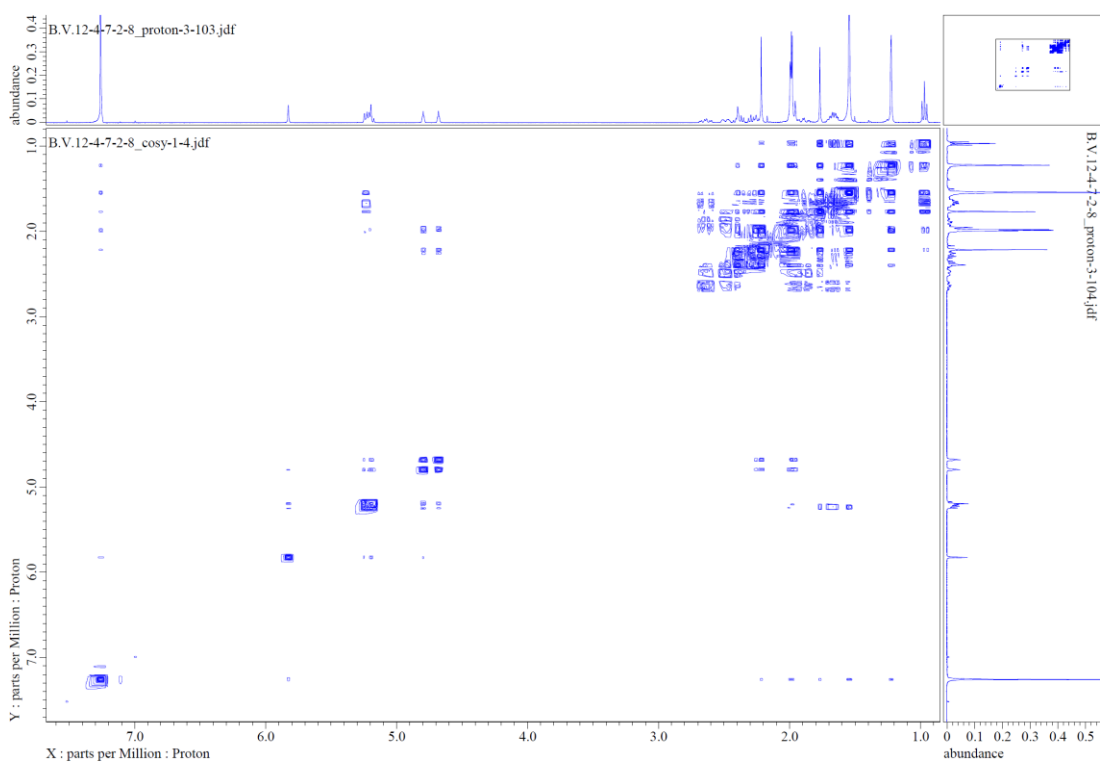

S16. <sup>1</sup>H-<sup>1</sup>H gCOSY spectrum of compound **2** in CDCl<sub>3</sub>.

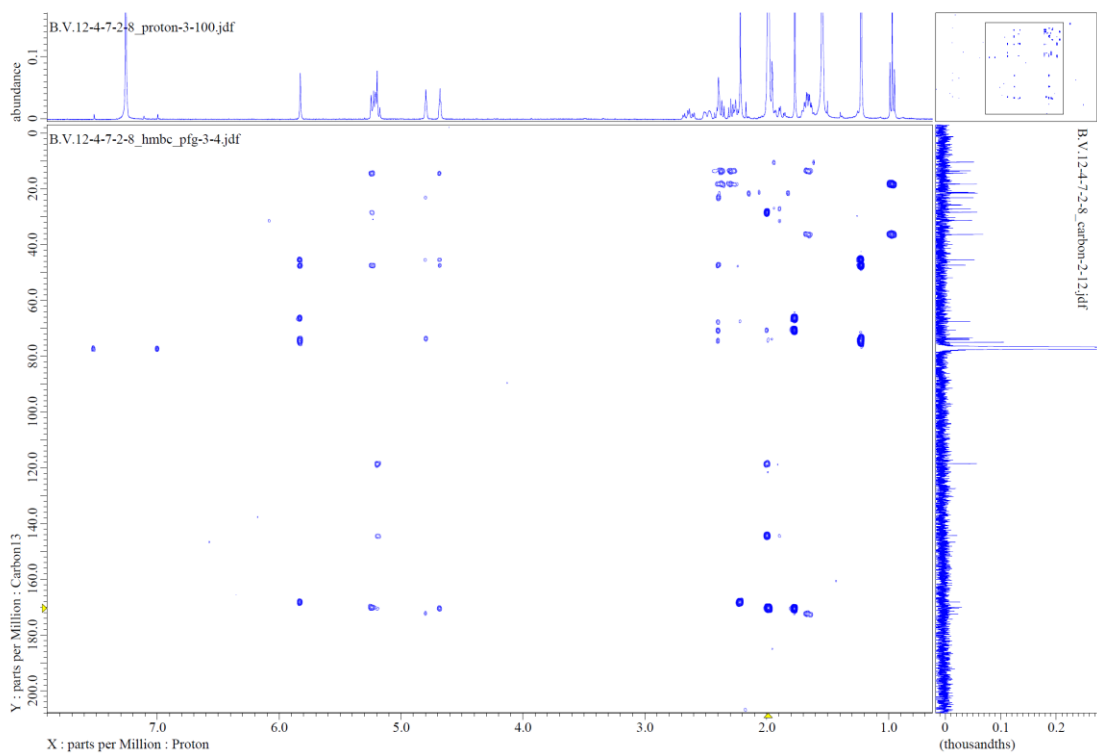

S17. gHMBC spectrum of compound **2** in CDCl<sub>3</sub>.

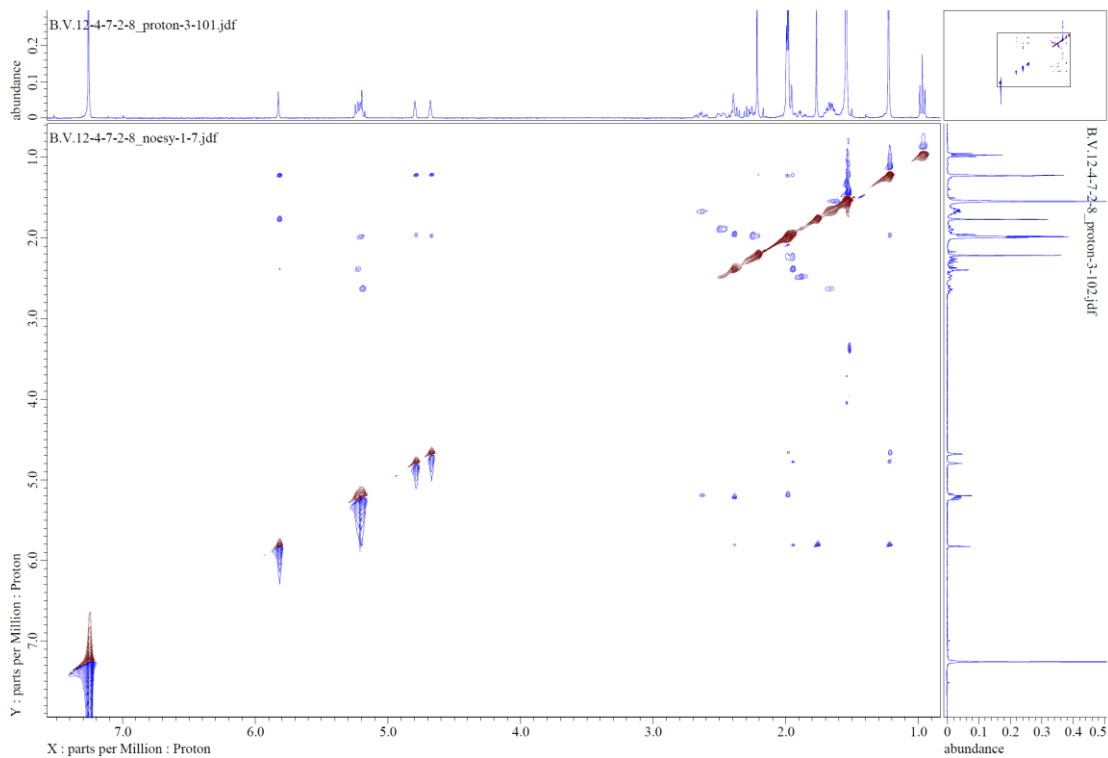

S18. NOESY spectrum of compound **2** in CDCl<sub>3</sub>.

## Mass Spectrum SmartFormula Report

### Analysis Info

Analysis Name D:\Data\2\BV1247211\_000004.d  
Method broadband first signal  
Sample Name BV 12-4-7-2-11  
Comment ESI Positive

9/22/2017 11:10:01 AM  
Operator: YU HSIAO-CHING  
Instrument: BRUKER FT-MS solariX

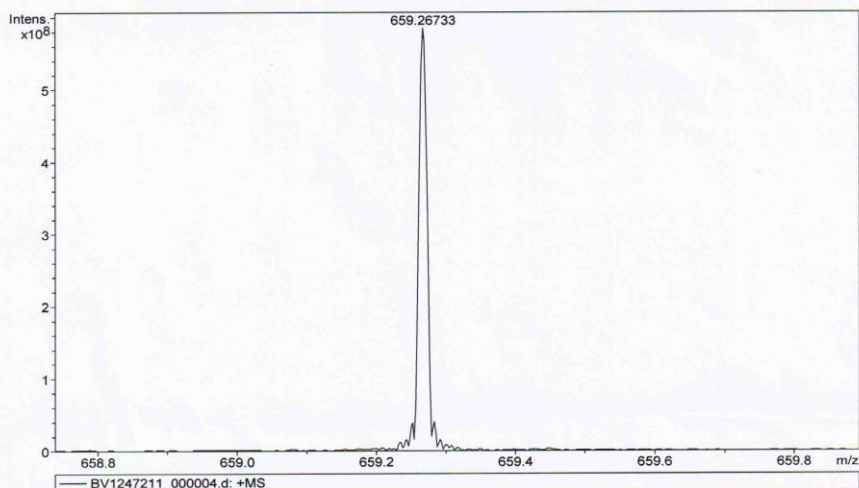

| Meas. m/z | # | Formula                                           | Score  | m/z       | err [mDa] | err [ppm] | mSigma | rdb  | e <sup>-</sup> Conf | N-Rule |
|-----------|---|---------------------------------------------------|--------|-----------|-----------|-----------|--------|------|---------------------|--------|
| 659.26733 | 1 | C <sub>32</sub> H <sub>44</sub> NaO <sub>13</sub> | 100.00 | 659.26741 | 0.09      | 0.13      | 3.6    | 10.5 | even                | ok     |

S19. HR-ESI-MS spectrum of compound 3.

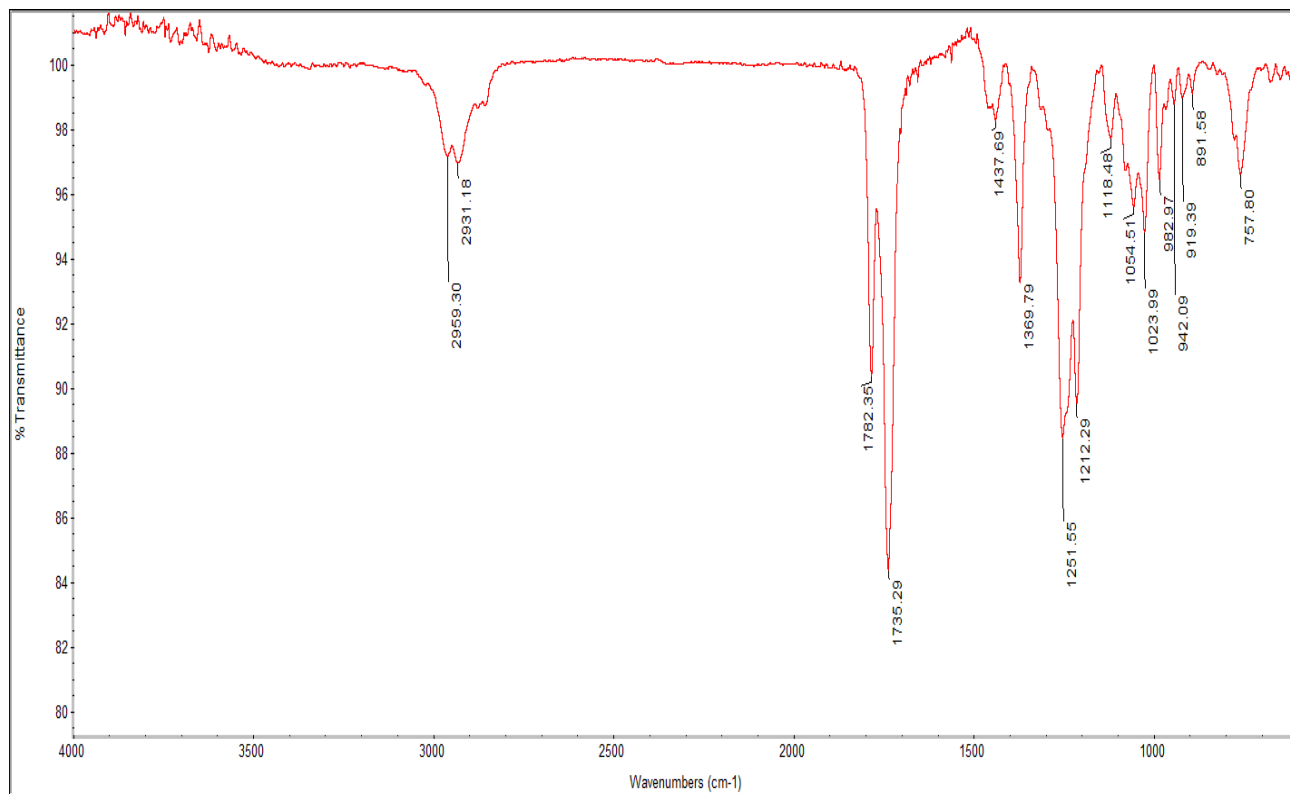

S20. IR spectrum of compound 3.

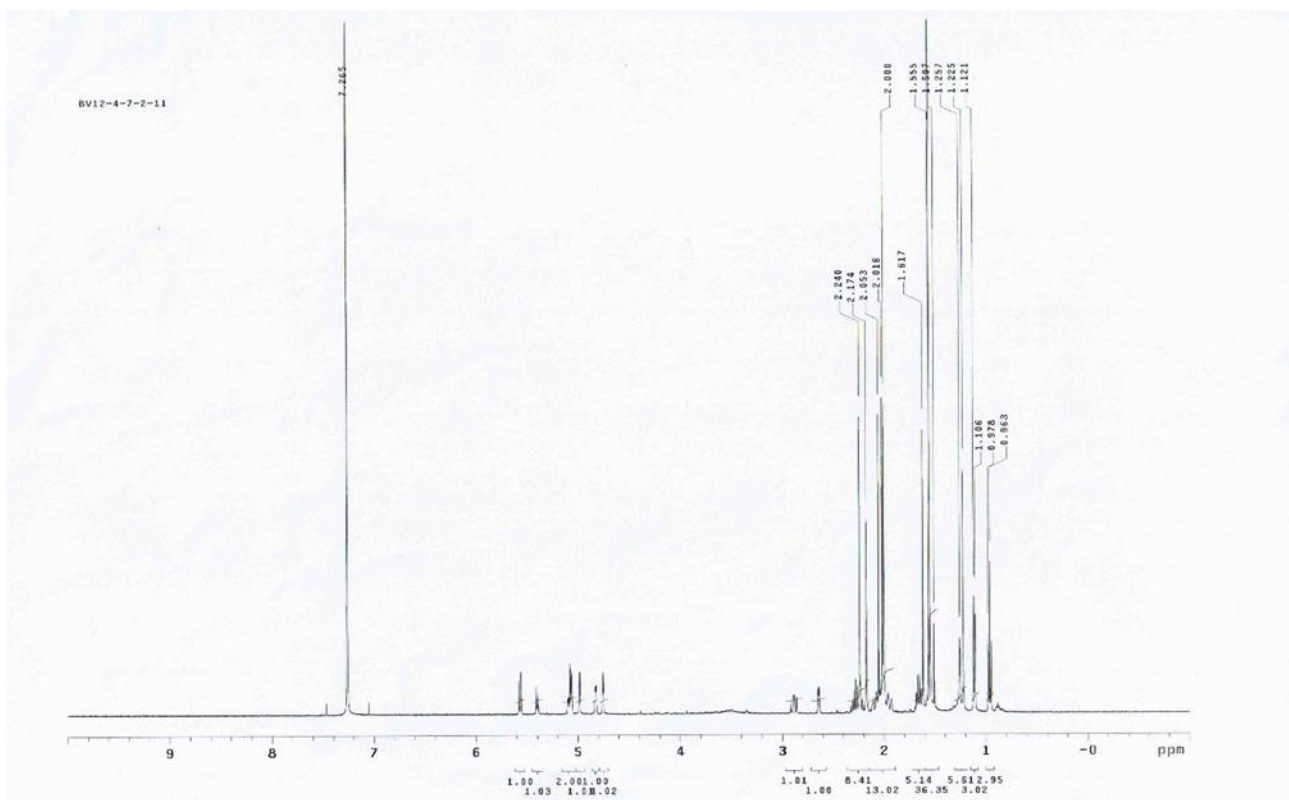

S21.  $^1\text{H}$  NMR spectrum (500 MHz) of compound **3** in  $\text{CDCl}_3$ .

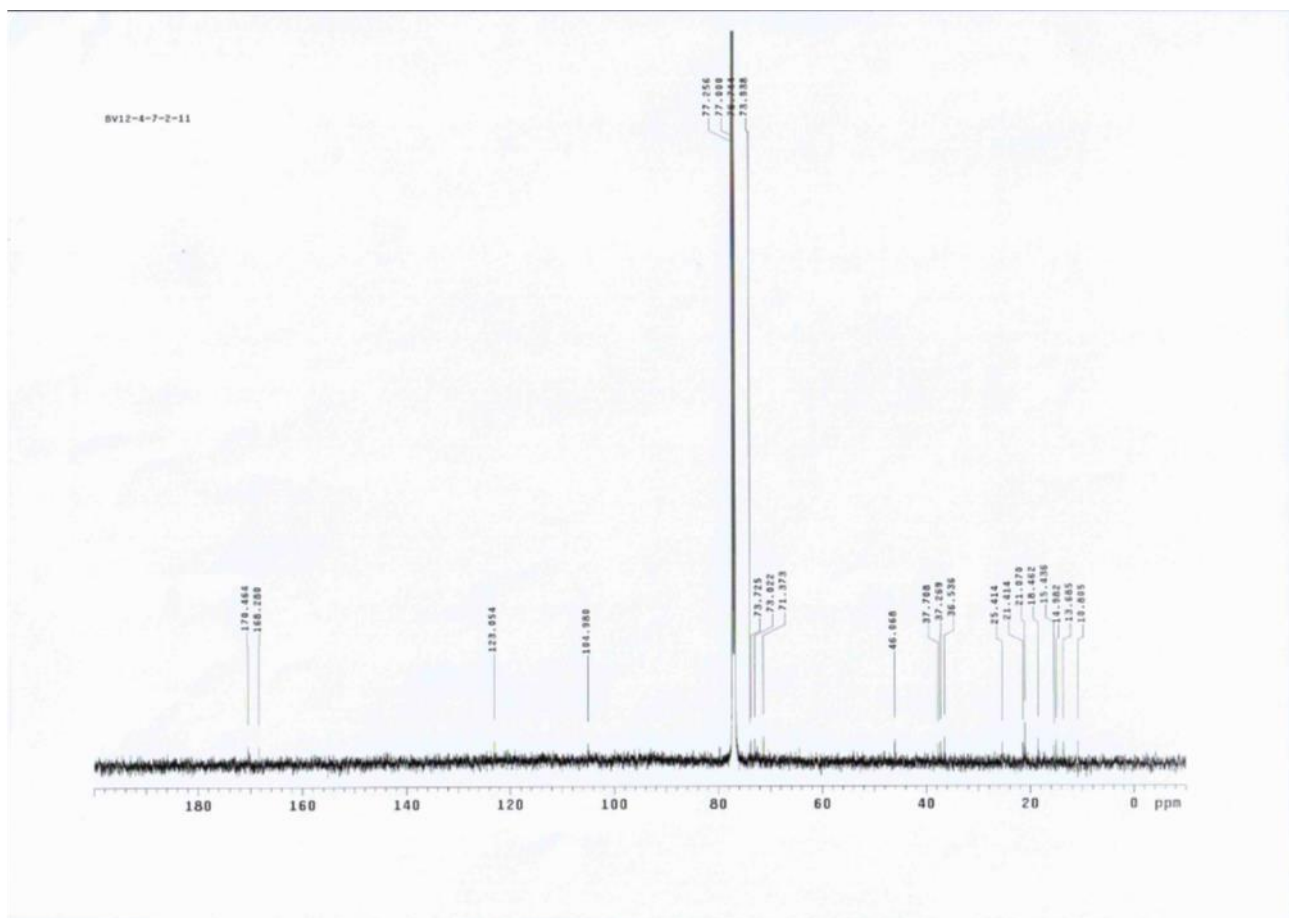

S22.  $^{13}\text{C}$  NMR spectrum (125 MHz) of compound **3** in  $\text{CDCl}_3$ .

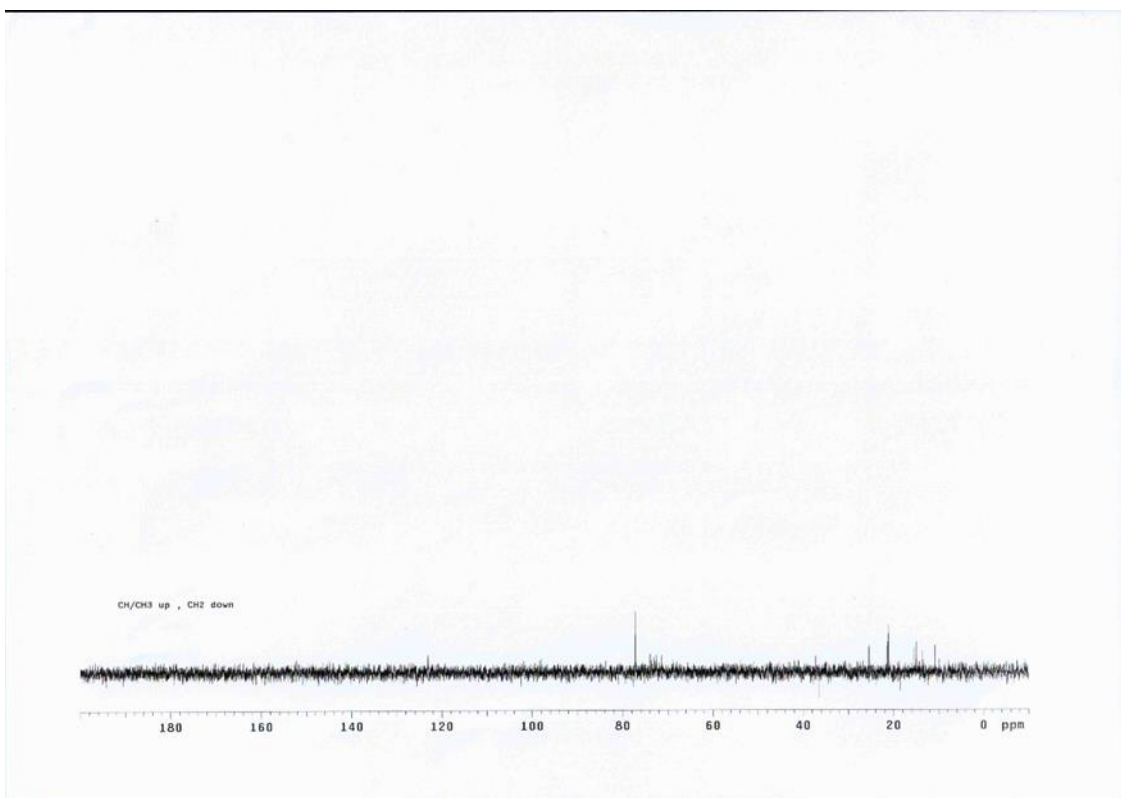

S23. DEPT spectrum (500 MHz) of compound **3** in CDCl<sub>3</sub>.

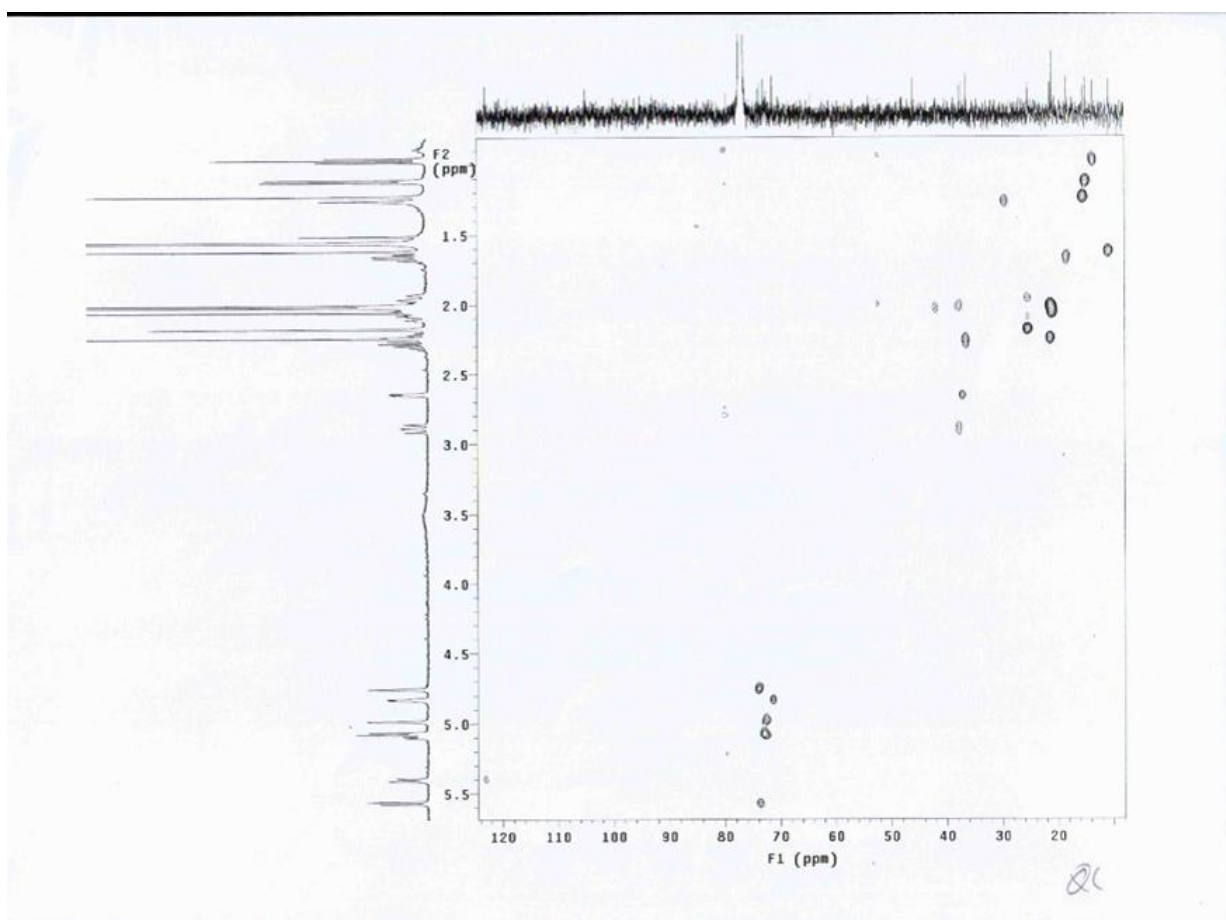

S24. gHSQC spectrum of compound **3** in CDCl<sub>3</sub>.

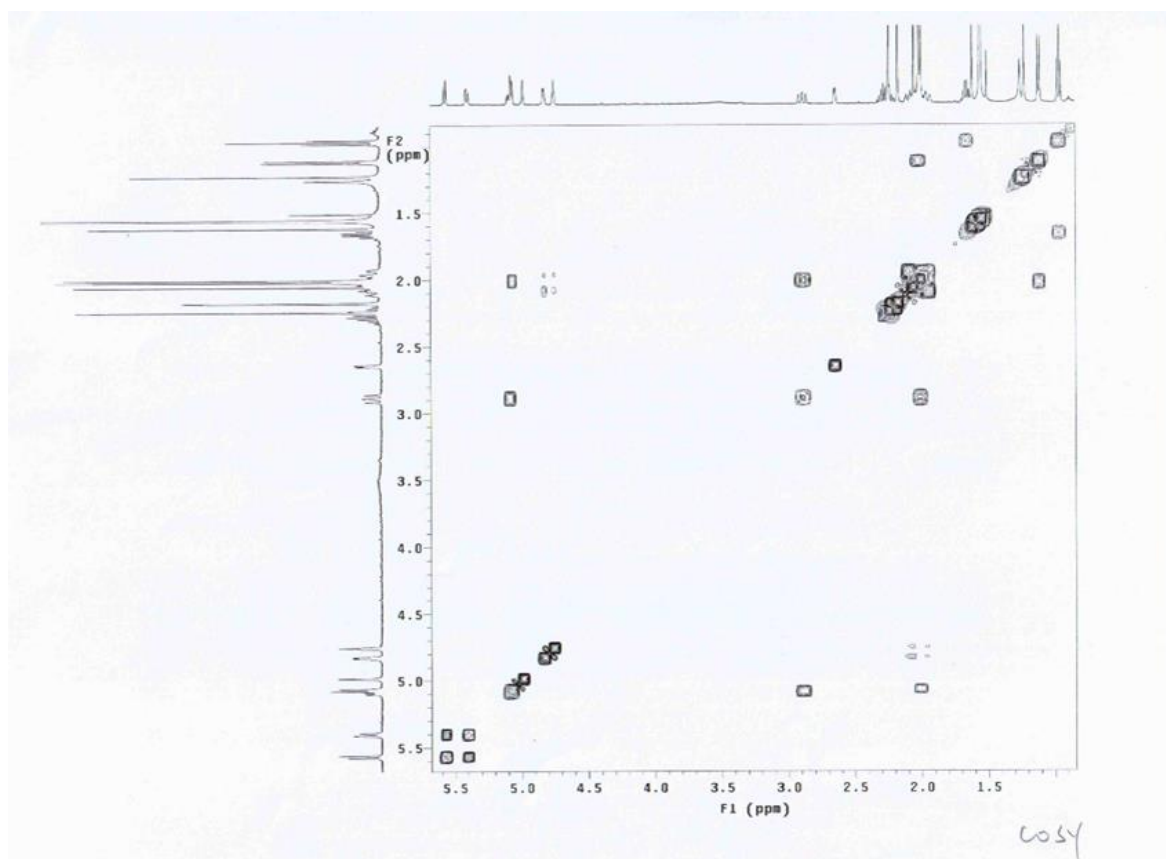

S25.  $^1\text{H}$ - $^1\text{H}$  gCOSY spectrum of compound **3** in  $\text{CDCl}_3$ .

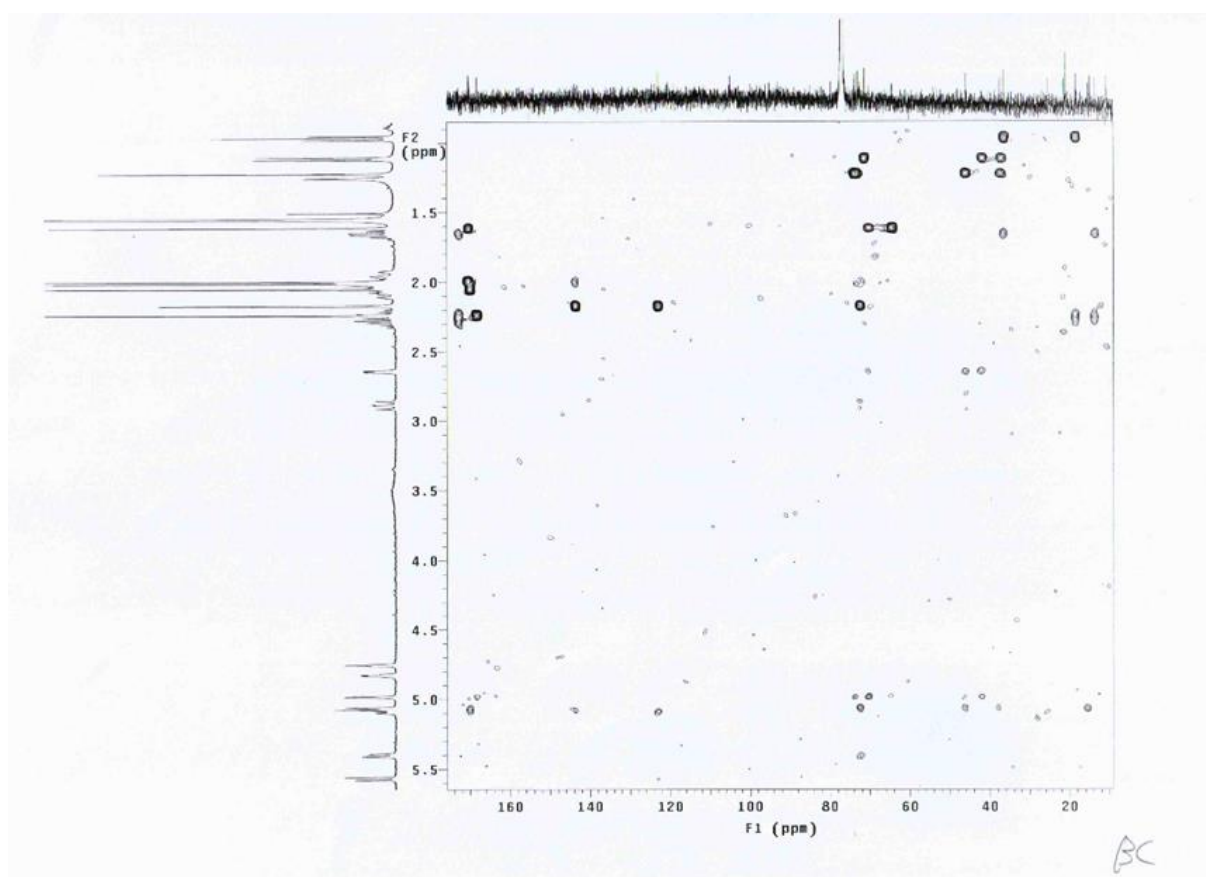

S26. gHMBC spectrum of compound **3** in  $\text{CDCl}_3$ .



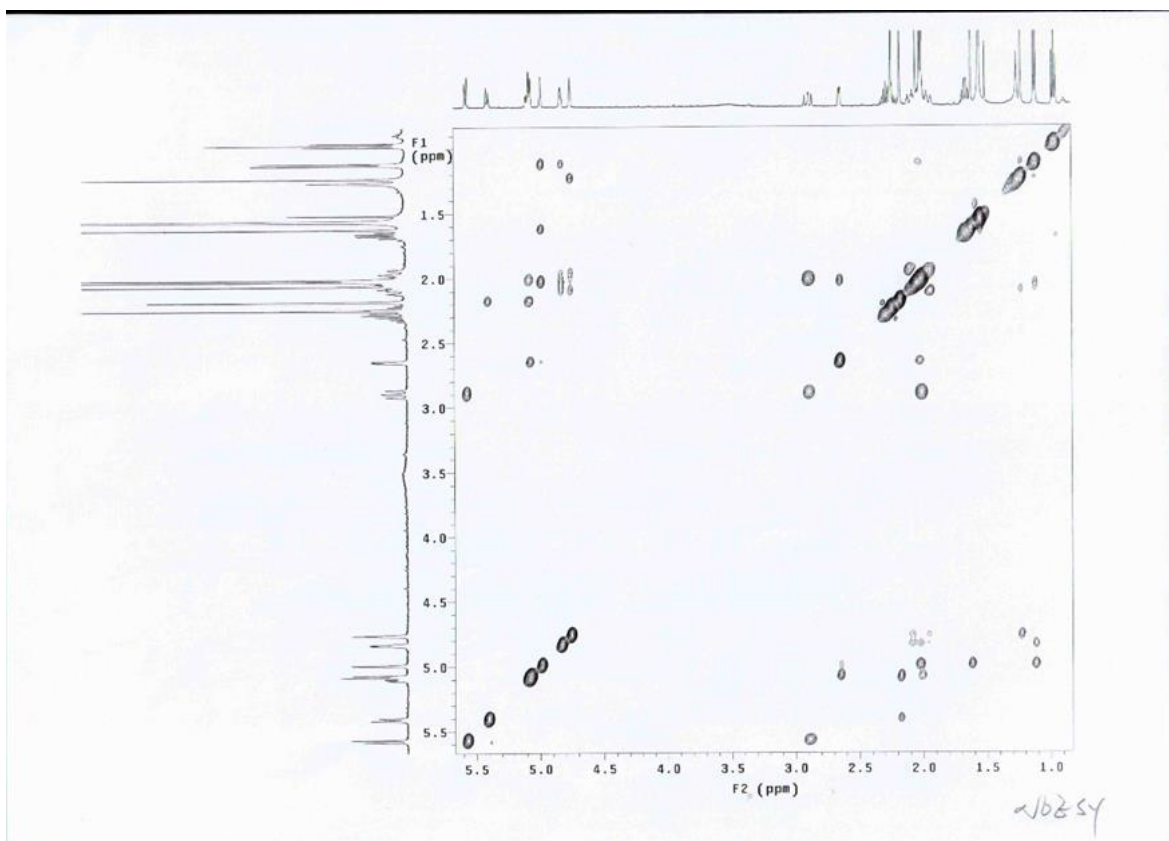

S27. NOESY spectrum of compound **3** in  $\text{CDCl}_3$ .

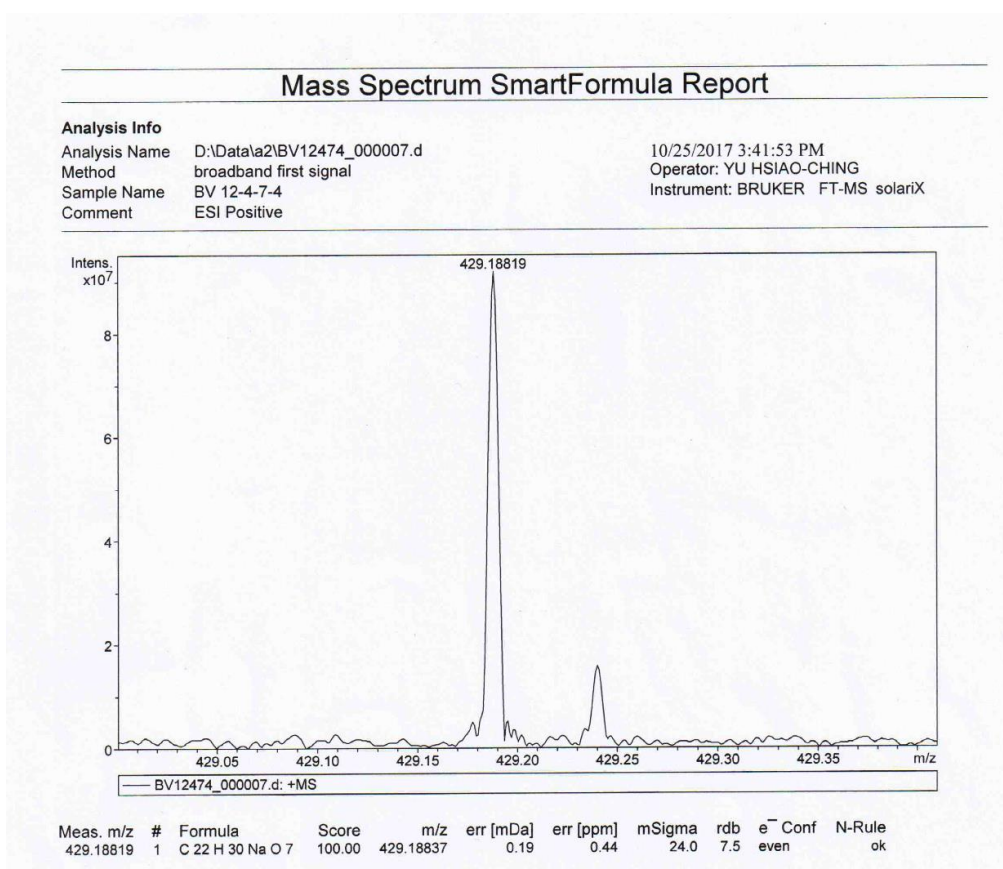

S28. HR-ESI-MS spectrum of compound **4**.



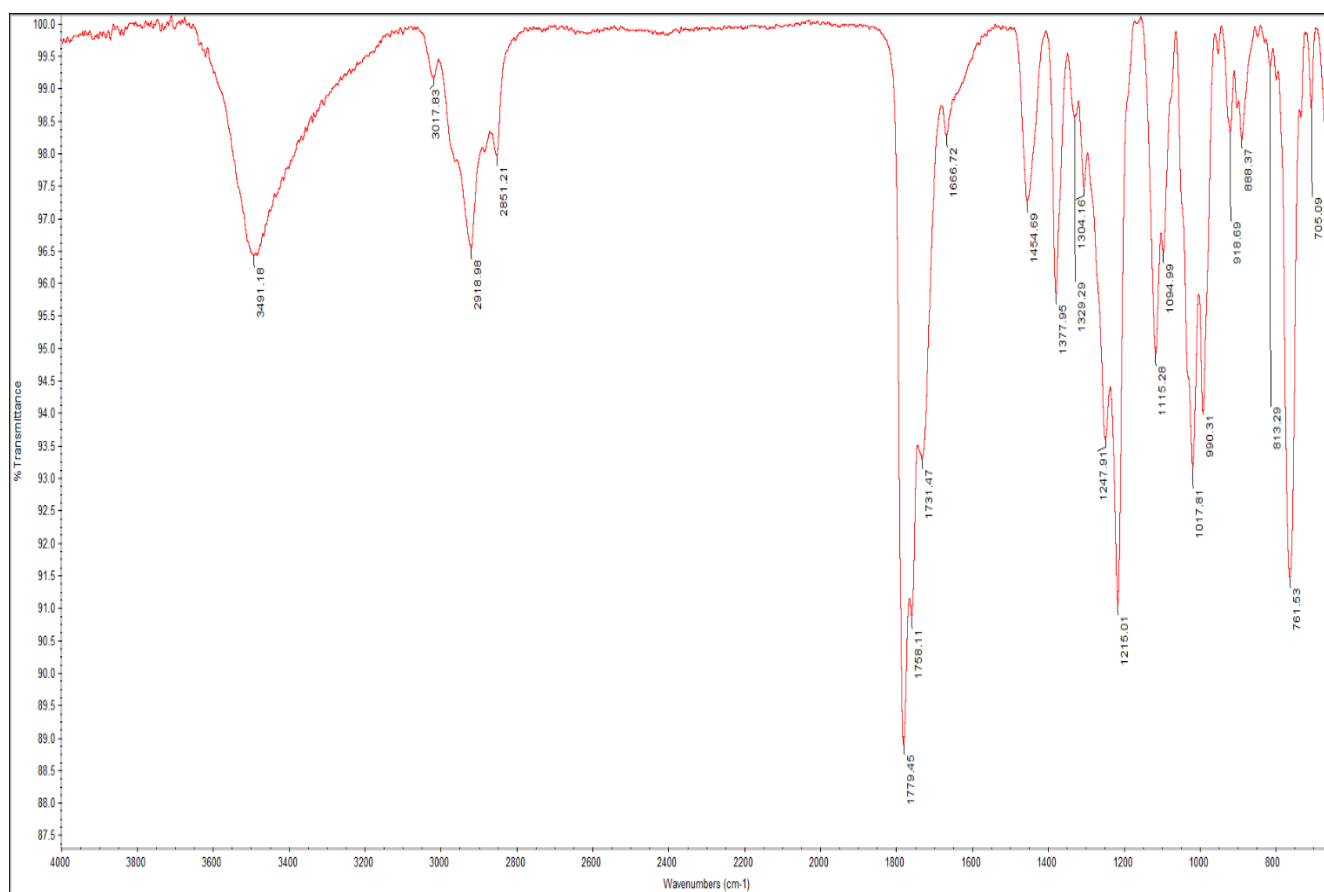

S29. IR spectrum of compound **4**.

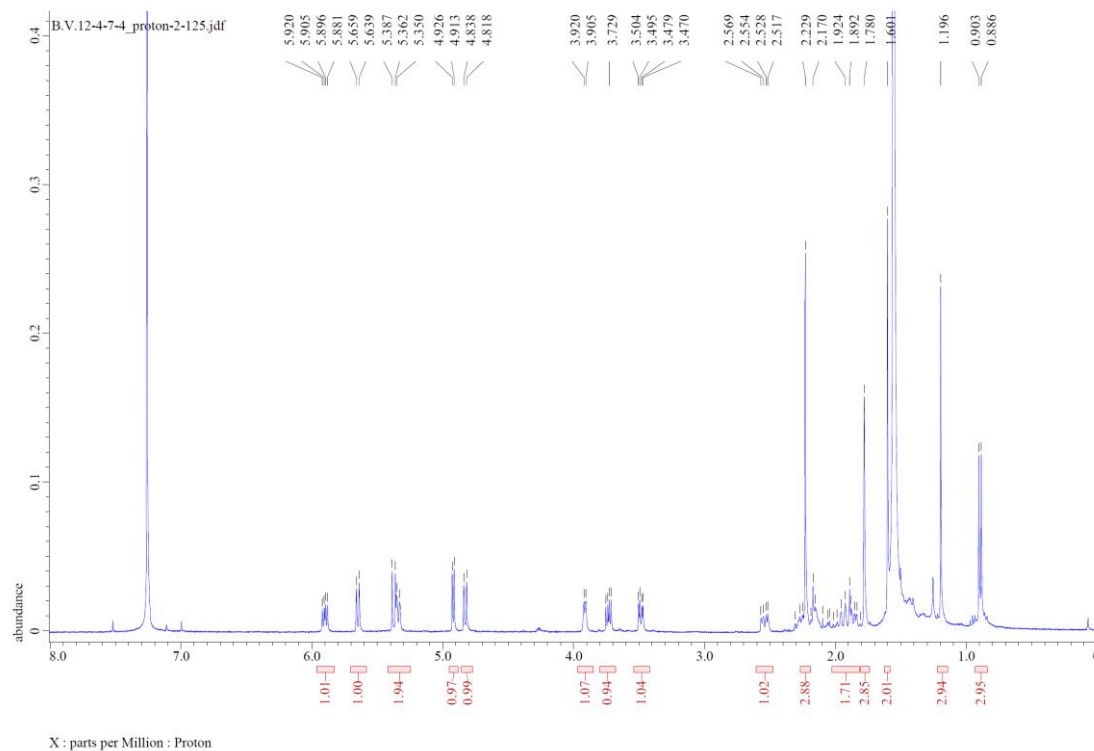

S30. <sup>1</sup>H NMR spectrum (400 MHz) of compound **4** in CDCl<sub>3</sub>.

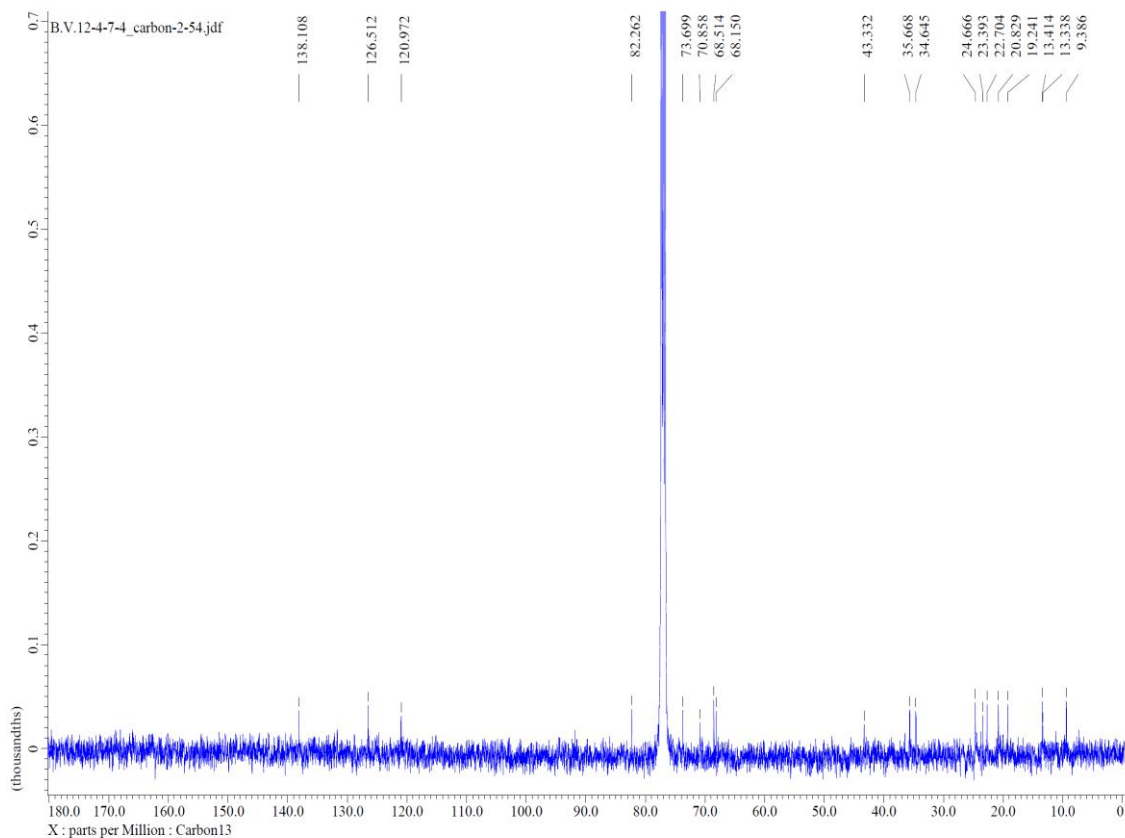

S31.  $^{13}\text{C}$  NMR spectrum (400 MHz) of compound **4** in  $\text{CDCl}_3$ .

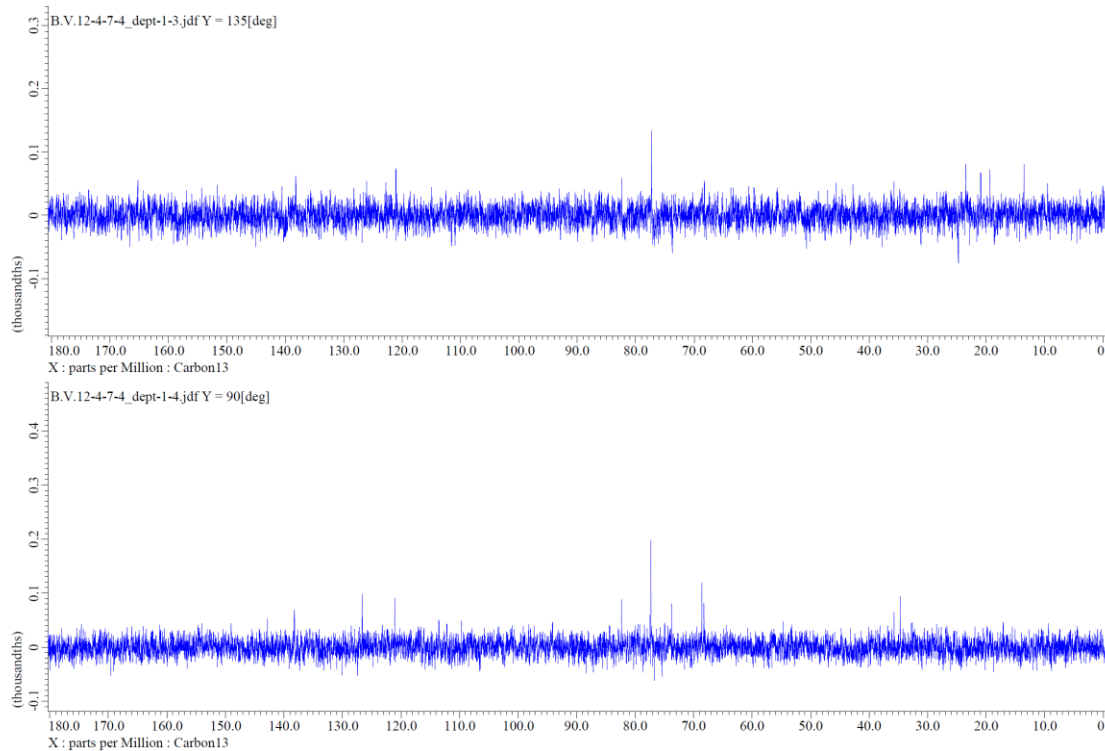

S32. DEPT spectrum (400 MHz) of compound **4** in  $\text{CDCl}_3$ .

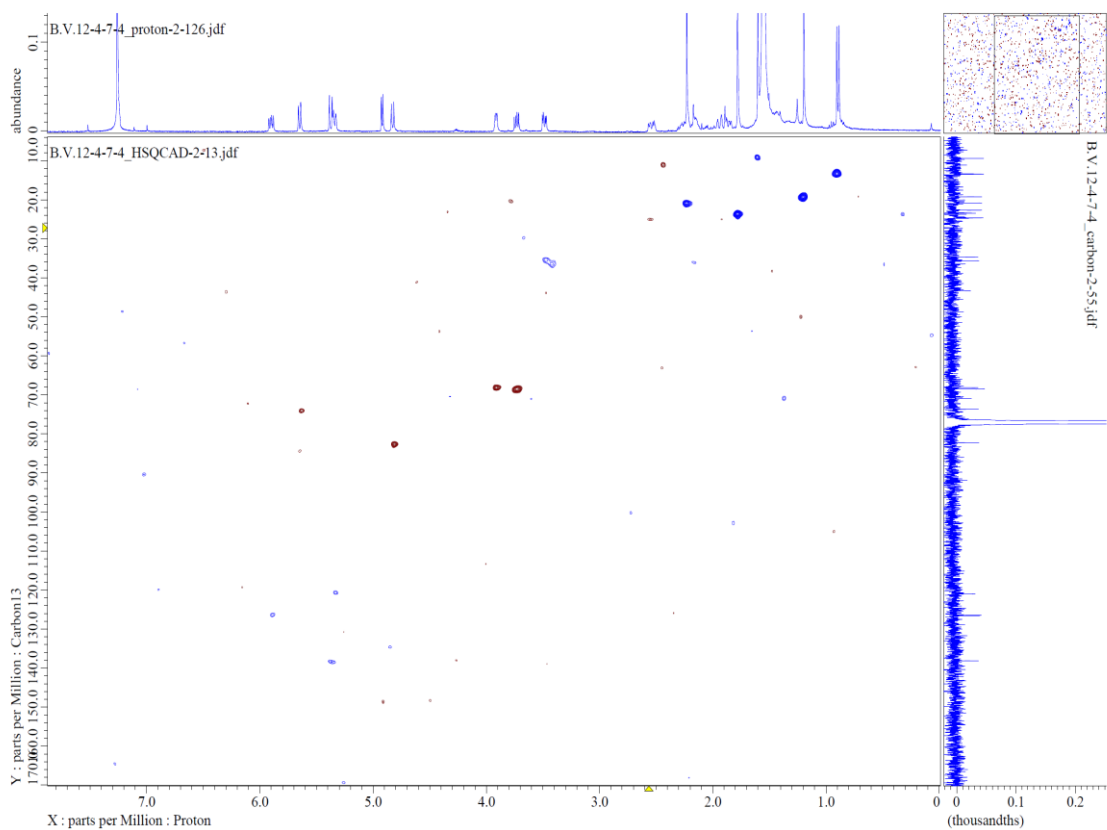

S33. gHSQC spectrum of compound **4** in CDCl<sub>3</sub>.

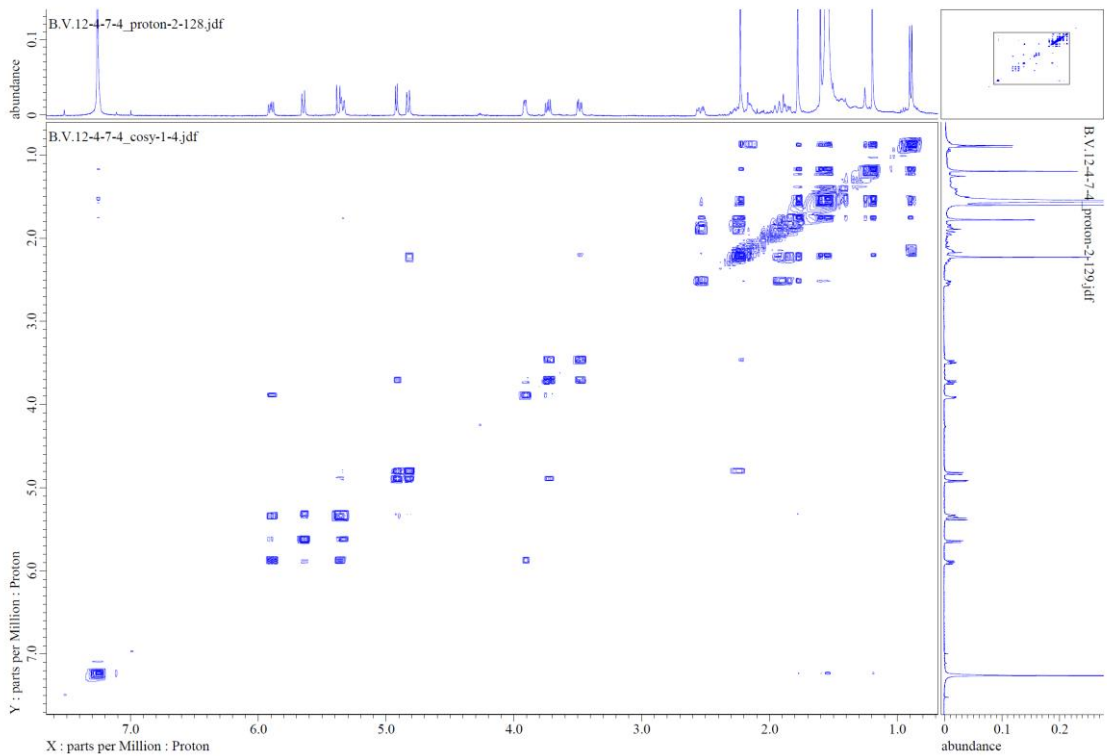

S34. <sup>1</sup>H-<sup>1</sup>H gCOSY spectrum of compound **4** in CDCl<sub>3</sub>.

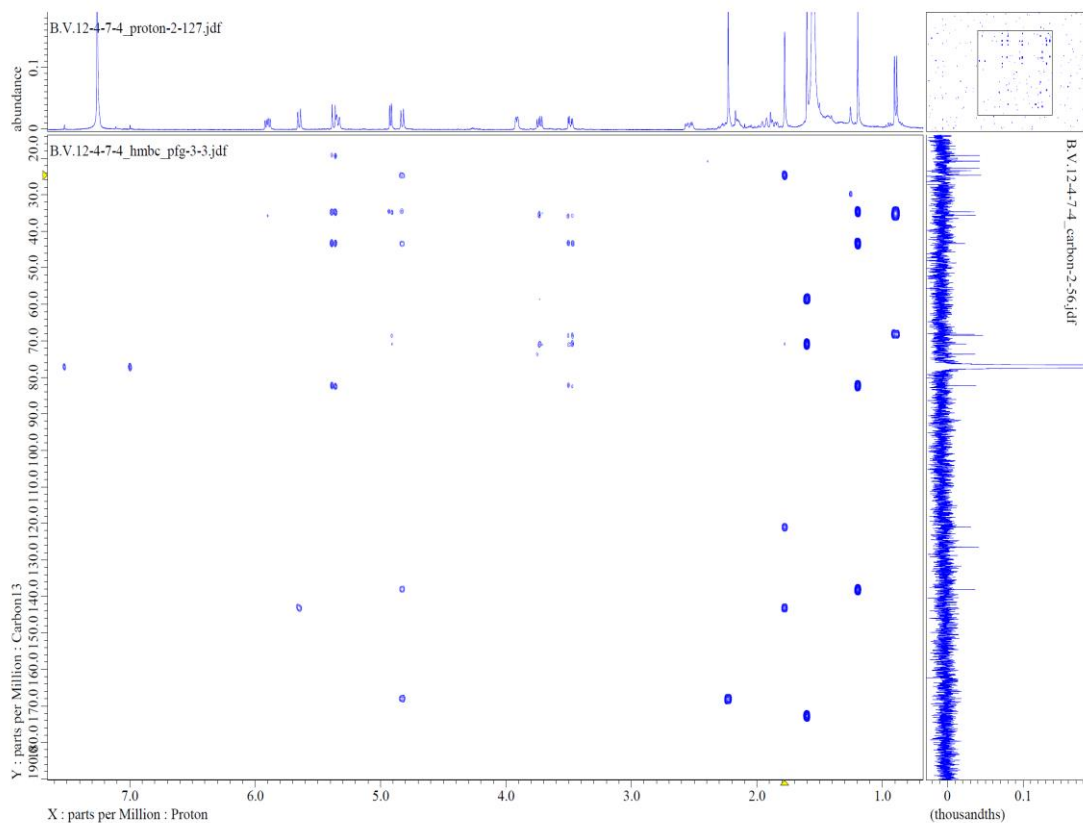

S35. gHMBC spectrum of compound 4 in CDCl<sub>3</sub>.

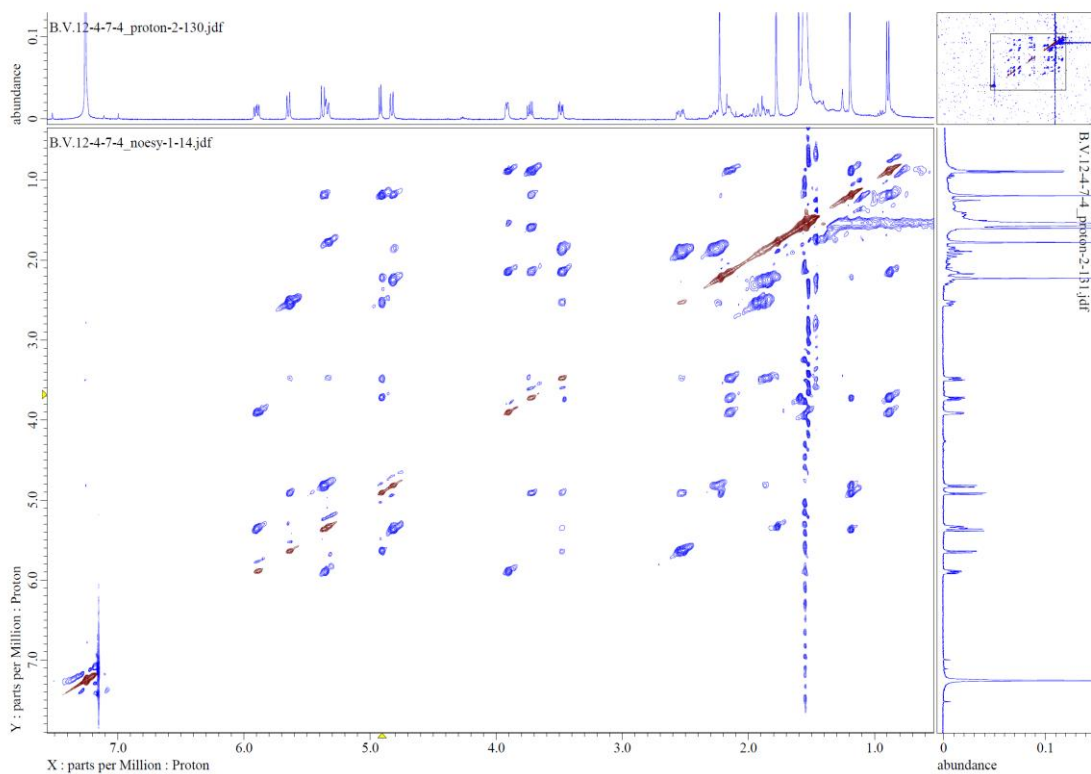

S36. NOESY spectrum of compound 4 in CDCl<sub>3</sub>.
